# Supplementary material for: A novel fluorine–metal exchange reaction of pentafluorocrotonate with organocuprate. Generation of β-metallated tetrafluorocrotonate and its cross-coupling reaction
Source: Royal Society of Chemistry journal article supplement (doi:10.1039/b705408d), 2007-01-01
Supplement: b705408d.pdf [file b705408d.pdf]

## ***Supporting Information***

***A novel fluorine-metal exchange reaction of pentafluorocrotonate  
with organocuprate – Generation of  $\beta$ -metallated  
tetrafluorocrotonate and its cross-coupling reaction***

*Shigeyuki Yamada, Toshio Takahashi, Tsutomu Konno, and Takashi Ishihara\**

*Department of Chemistry and Materials Technology,  
Kyoto Institute of Technology  
Matsugasaki, Sakyo-ku, Kyoto 606-8585, Japan  
ishihara@kit.ac.jp*

## Experimental

### 1. Measurements and materials

$^1\text{H}$  and  $^{13}\text{C}$  NMR spectra were measured with a Bruker DRX-500 (500.13 MHz for  $^1\text{H}$  and 125.75 MHz for  $^{13}\text{C}$ ) spectrometer in a chloroform-*d* ( $\text{CDCl}_3$ ) solution with tetramethylsilane as an internal reference. A JEOL JNM-AL400 (376.05 MHz) was used to measure  $^{19}\text{F}$  NMR spectra in  $\text{CDCl}_3$  using trichlorofluoromethane as an internal standard. Infrared spectra (IR) were determined in a liquid film or KBr disk method with a AVATAR-370DTGS spectrometer (Thermo ELECTRON) or a FT/IR-4100 (JASCO). High resolution mass spectra were taken with a JEOL JMS-700 MS spectrometer. Elemental analyses were conducted with a Yanaco CHN CORDER MT-5 instrument. Column chromatography was carried out on silica gel (Wako gel C-200) and TLC analysis was performed on silica gel TLC plates (Merck, Silica gel 60 F<sub>254</sub>).

Anhydrous tetrahydrofuran (THF) and diethyl ether were purchased from Wako chemicals. All chemicals were of reagent grade and, if necessary, were purified in the usual manner prior to use. All reactions were carried out under an atmosphere of argon.

### 2. Preparation of fluorinated substrate 1a-c

#### 2.1. Preparation of diethyl (Z)-1-(diethoxyphosphinyl)oxy-1-perfluorobutenephosphonate<sup>1</sup>

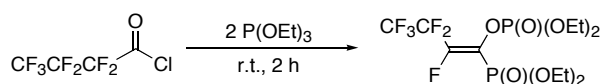

In a two-necked round-bottomed flask, equipped with a teflon stirrer bar, a rubber septum, and an inlet tube for argon, was placed 20 mmol of triethyl phosphite. After the flask was cooled by immersing in an ice-methanol bath, 10 mmol of freshly prepared perfluorobutanoic acid chloride **5**, prepared according to literature method<sup>2</sup>, was introduced to it via a syringe at such rate that the mixture was stirred at room temperature for 2 h. To this mixture, recooled to 0 °C, was gradually added 50 mL of water by use of a syringe. The resultant solution was subjected to extraction with diethyl ether (50 mL  $\times$  3) and the ethereal extracts were washed with 5% aqueous sodium hydrogen carbonate, dried over anhydrous sodium sulfate, and concentrated under reduced pressure. The residue was chromatographed on

silica gel (hexane/AcOEt = 1 : 1) to give pure (Z)-1-(diethoxyphosphinyl)oxy-1-perfluorobutenephosphonate as a viscous oil.

### 2.1.1. (Z)-1-(diethoxyphosphinyl)oxy-1-perfluorobutenephosphonate

Yield: 50%;  $^1\text{H}$  NMR ( $\text{CDCl}_3$ )  $\delta$  1.25 ~ 1.31 (m, 12H), 4.14 ~ 4.22 (m, 8H);  $^{19}\text{F}$  NMR ( $\text{CDCl}_3$ ,  $\text{CFCl}_3$ )  $\delta$  -137.45 ~ -137.32 (m, 1F), -119.55 ~ -119.45 (m, 2F), -84.05 ~ -83.95 (m, 3F);  $^{31}\text{P}$  NMR ( $\text{CDCl}_3$ ,  $\text{H}_3\text{PO}_4$ )  $\delta$  2.07 (d,  $J$  = 10.2 Hz, 1P), -7.22 (dd,  $J$  = 10.2, 2.4 Hz, 1P), IR (neat) 3412 (m), 2990 (m), 1764 (m), 1481 (m), 1363 (s), 1274 (s), 1216 (s), 1149 (s), 1031 (vs), 870 (m)  $\text{cm}^{-1}$ ; HRMS (FAB) Calcd for (M+H)  $\text{C}_{12}\text{H}_{21}\text{F}_6\text{O}_7\text{P}_2$ : 453.0667, Found 453.0678.

## 2.2. Typical procedure for the preparation of benzyl 2,3,4,4,4-pentafluorocrotonate (**1a**)

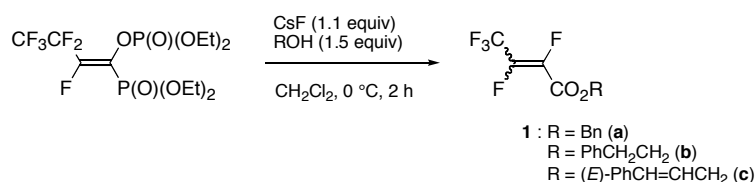

Compounds **1a**, **1b**, and **1c** was prepared by slight modifications of the previously reported methods,<sup>3</sup> as follows: A two-necked round-bottomed flask, equipped with a teflon stirrer bar, a rubber septum, and an inlet tube for argon was charged with a suspended solution of CsF (1.1 equiv, 5.5 mmol) and benzyl alcohol (1.5 equiv, 7.5 mmol) in  $\text{CH}_2\text{Cl}_2$  (10 mL). After the flask was cooled by immersing in an ice-methanol bath, vinyl phosphonate (5.0 mmol) was introduced to it *via* a syringe at such rate that the mixture was stirred at 0 °C for 2 h. The resultant solution was poured into ice-cooled water (30 mL), followed by extraction with diethyl ether (30 mL  $\times$  3) and the organic layers were dried over anhydrous sodium sulfate, filtered and concentrated with a rotary evaporator under reduced pressure. Column chromatography of the residue using hexane/benzene (5:1) gave pure product, benzyl 2,3,4,4,4-pentafluorocrotonate (**1a**) as a mixture of the *E/Z* isomers (*E/Z* = ~90/10).

### 2.2.1. Benzyl 2,3,4,4,4-pentafluorocrotonate (**1a**)

Yield: 50%; *E*-**1a** :  $^1\text{H}$  NMR ( $\text{CDCl}_3$ )  $\delta$  5.37 (s, 2H), 7.35 ~ 7.42 (m, 5H);  $^{19}\text{F}$  NMR ( $\text{CDCl}_3$ ,  $\text{CFCl}_3$ )  $\delta$  -153.84 (dq,  $J$  = 138.6, 18.8 Hz, 1F), -150.63 (dq,  $J$  = 138.6, 6.6 Hz, 1F), -68.91 (dd,

$J = 18.8, 6.6 \text{ Hz}, 3\text{F}$ );  $^{13}\text{C}$  NMR ( $\text{CDCl}_3$ )  $\delta$  68.36, 118.16 (qdd,  $J = 274.8, 31.4, 4.0 \text{ Hz}$ ), 128.46, 128.69, 128.86, 134.10, 141.59 (ddq,  $J = 230.0, 32.8, 2.4 \text{ Hz}$ ), 145.08 (ddd,  $J = 273.2, 41.0, 41.0 \text{ Hz}$ ), 157.27 (dd,  $J = 30.4, 6.2 \text{ Hz}$ ); **Z-1a** :  $^1\text{H}$  NMR ( $\text{CDCl}_3$ )  $\delta$  5.344 (s, 2H), 7.35 ~ 7.42 (m, 5H);  $^{19}\text{F}$  NMR ( $\text{CDCl}_3, \text{CFCl}_3$ )  $\delta$  -136.00 ~ -137.00 (m, 2F), -65.67 (dd,  $J = 8.8, 8.8 \text{ Hz}, 3\text{F}$ ); IR (neat) 3038 (w), 2966 (w), 1751 (vs), 1458 (m), 1372 (s), 1273 (vs), 1224 (vs), 1162 (vs), 960 (m)  $\text{cm}^{-1}$ ; HRMS (EI) Calcd for ( $\text{M}^+$ )  $\text{C}_{11}\text{H}_7\text{F}_5\text{O}_2$ : 266.0366, Found 266.0356; Anal. Calcd for  $\text{C}_{11}\text{H}_7\text{F}_5\text{O}_2$ : C, 49.64; H, 2.65. Found: C, 49.60; H, 2.75.

### 2.2.2. 2-Phenylethyl 2,3,4,4,4-pentafluorocrotonate (**1b**)

**E-1b** :  $^1\text{H}$  NMR ( $\text{CDCl}_3$ )  $\delta$  3.05 (t,  $J = 6.9 \text{ Hz}, 2\text{H}$ ), 4.55 (t,  $J = 6.9\text{Hz}, 2\text{H}$ ), 7.23 ~ 7.30 (m, 3H), 7.31 ~ 7.37 (m, 2H);  $^{19}\text{F}$  NMR ( $\text{CDCl}_3, \text{CFCl}_3$ )  $\delta$  -153.70 (dq,  $J = 139.1, 22.1 \text{ Hz}, 1\text{F}$ ), -151.16 (dq,  $J = 139.1, 9.8 \text{ Hz}, 1\text{F}$ ), -68.88 (dd,  $J = 22.1, 9.8 \text{ Hz}, 3\text{F}$ );  $^{13}\text{C}$  NMR ( $\text{CDCl}_3$ )  $\delta$  34.73, 67.44, 118.07 (qdd,  $J = 274.9, 34.9, 3.6 \text{ Hz}$ ), 126.95, 128.66, 128.90, 136.66, 141.49 (ddq,  $J = 262.8, 33.1, 2.4 \text{ Hz}$ ), 145.01 (ddq,  $J = 273.6, 41.0, 41.0 \text{ Hz}$ ), 157.43 (dd,  $J = 30.7, 6.2 \text{ Hz}$ ); **Z-1b** :  $^1\text{H}$  NMR ( $\text{CDCl}_3$ )  $\delta$  3.03 (t,  $J = 6.5 \text{ Hz}, 2\text{H}$ ), 4.53 (t,  $J = 6.5 \text{ Hz}, 2\text{H}$ ), 7.23 ~ 7.30 (m, 3H), 7.31 ~ 7.37 (m, 2H);  $^{19}\text{F}$  NMR ( $\text{CDCl}_3, \text{CFCl}_3$ )  $\delta$  -137.15 ~ -136.75 (m, 1F), -136.45 ~ -136.10 (m, 1F), -65.67 (dd,  $J = 9.4, 9.4 \text{ Hz}, 3\text{F}$ ); IR (neat) 3031 (m), 2964 (m), 1750 (vs), 1702 (m), 1605 (w), 1498 (m), 1375 (s), 1276 (vs), 1227 (vs), 1163 (vs), 984 (s)  $\text{cm}^{-1}$ ; HRMS (FAB) Calcd for ( $\text{M}+\text{H}$ )  $\text{C}_{12}\text{H}_{10}\text{F}_5\text{O}_2$ : 281.0602, Found 281.0594.

### 2.2.3. 3-Phenyl-2-propen-1-yl 2,3,4,4,4-pentafluorocrotonate (**1c**)

**E-1c** :  $^1\text{H}$  NMR ( $\text{CDCl}_3$ )  $\delta$  5.00 (dd,  $J = 6.6, 0.8 \text{ Hz}, 2\text{H}$ ), 6.31 (dt,  $J = 15.8, 6.6 \text{ Hz}, 1\text{H}$ ), 6.76 (d,  $J = 15.8 \text{ Hz}, 1\text{H}$ ), 7.27 ~ 7.37 (m, 3H), 7.39 ~ 7.44 (m, 2H);  $^{19}\text{F}$  NMR ( $\text{CDCl}_3, \text{CFCl}_3$ )  $\delta$  -153.61 (dq,  $J = 139.1, 21.8 \text{ Hz}, 1\text{F}$ ), -150.99 (dq,  $J = 139.1, 9.8 \text{ Hz}, 1\text{F}$ ), -68.88 (dd,  $J = 21.8, 9.8 \text{ Hz}, 3\text{F}$ );  $^{13}\text{C}$  NMR ( $\text{CDCl}_3$ )  $\delta$  67.44, 118.07 (qdd,  $J = 275.0, 35.3, 3.8 \text{ Hz}$ ), 120.84, 126.77, 128.55, 128.69, 136.32, 136.58, 141.54 (ddq,  $J = 230.4, 32.9, 2.4 \text{ Hz}$ ), 145.09 (ddq,  $J = 273.7, 40.9, 40.9 \text{ Hz}$ ), 157.34 (dd,  $J = 30.2, 6.2 \text{ Hz}$ ); **Z-1c** :  $^1\text{H}$  NMR ( $\text{CDCl}_3$ )  $\delta$  4.98 (dd,  $J = 6.9, 0.9 \text{ Hz}, 2\text{H}$ ), 6.29 (dt,  $J = 15.9, 6.9 \text{ Hz}, 1\text{H}$ ), 6.75 (d,  $J = 15.9 \text{ Hz}, 1\text{H}$ ), 7.27 ~ 7.37 (m, 3H), 7.39 ~ 7.44 (m, 2H);  $^{19}\text{F}$  NMR ( $\text{CDCl}_3, \text{CFCl}_3$ )  $\delta$  -136.85 ~ -136.55 (m, 1F), -136.40 ~ -136.15 (m, 1F), -65.65 (dd,  $J = 9.4, 9.4 \text{ Hz}, 3\text{F}$ ); IR (neat) 3029 (m), 2957 (w),

1749 (vs), 1701 (m), 1495 (m), 1371 (s), 1270 (vs), 1222 (vs), 1162 (vs), 966 (s)  $\text{cm}^{-1}$ ; HRMS (FAB) Calcd for ( $\text{M}^+$ )  $\text{C}_{13}\text{H}_9\text{F}_5\text{O}_2$ : 292.0523, Found 292.0530.

### 3. Typical procedure for the preparation of benzyl 2,4,4,4-tetrafluorocrotonate (**4a-H**)

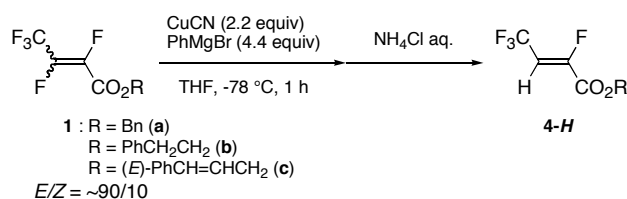

A 30 mL-two necked round bottomed flask equipped with a magnetic stirrer bar, a rubber septum and an inlet tube for argon was charged with a suspended solution of CuCN (2.2 equiv) in THF (1 mL). To this solution was slowly added a solution of phenylmagnesium bromide (4.4 equiv) in THF *via* a syringe at  $-78\text{ }^\circ\text{C}$ . The whole was warmed up at  $-20\text{ }^\circ\text{C}$  and stirred for 15 min. To the resulting solution was added benzyl 2,3,4,4,4-pentafluoro-2-buten-1-yl ester (**2a**, 1.0 equiv) *via* a syringe at  $-78\text{ }^\circ\text{C}$ . After being stirred for 1 h, the reaction mixture was poured into ice-cooled saturated aqueous  $\text{NH}_4\text{Cl}$  (30 mL), followed by extraction with ether (30 mL  $\times$  5). The organic layers were dried over anhydrous sodium sulfate, filtered and concentrated with a rotary evaporator. Column chromatography of the residue using hexane/benzene (5:1) yielded pure benzyl 2,4,4,4-tetrafluorocrotonate (**4a-H**).

#### 3.1. (*Z*)-Benzyl 2,4,4,4-tetrafluorocrotonate (**4a-H**)

Yield: 50%;  $^1\text{H}$  NMR ( $\text{CDCl}_3$ )  $\delta$  5.33 (s, 2H), 6.28 (dq,  $J = 28.1, 7.5\text{ Hz}$ , 1H), 7.35 ~ 7.41 (m, 5H);  $^{19}\text{F}$  NMR ( $\text{CDCl}_3$ ,  $\text{CFCl}_3$ )  $\delta$  -111.08 (dq,  $J = 28.1, 17.3\text{ Hz}$ , 1F), -59.80 (dd,  $J = 17.3, 7.5\text{ Hz}$ , 1F);  $^{13}\text{C}$  NMR ( $\text{CDCl}_3$ )  $\delta$  68.63, 106.95 (qd,  $J = 37.2, 5.6\text{ Hz}$ ), 121.07 (q,  $J = 270.5\text{ Hz}$ ), 128.69, 128.80, 129.05, 133.99, 158.55 (d,  $J = 34.1\text{ Hz}$ ), 151.99 (dq,  $J = 284.4, 5.0\text{ Hz}$ ); IR (neat) 3038 (w), 2963 (w), 1753 (vs), 1697 (s), 1458 (m), 1365 (s), 1283 (vs), 1178 (vs), 1073 (m), 947 (w)  $\text{cm}^{-1}$ ; HRMS (EI) Calcd for ( $\text{M}^+$ )  $\text{C}_{11}\text{H}_8\text{F}_4\text{O}_2$ : 248.0460, Found 248.0458.

#### 3.2. 2-Phenylethyl 2,4,4,4-tetrafluorocrotonate (**4b-H**)

Yield: 50%;  $^1\text{H}$  NMR ( $\text{CDCl}_3$ )  $\delta$  3.02 (t,  $J = 7.0\text{ Hz}$ , 2H), 4.87 (t,  $J = 7.0\text{ Hz}$ , 2H), 6.20 (dq,  $J = 28.1, 7.5\text{ Hz}$ , 1H), 7.20 ~ 7.37 (m, 5H);  $^{19}\text{F}$  NMR ( $\text{CDCl}_3$ ,  $\text{CFCl}_3$ )  $\delta$  -111.24 (dq,  $J = 28.1,$

16.9 Hz, 1F), -59.80 (dd,  $J = 16.9, 7.5$  Hz, 1F);  $^{13}\text{C}$  NMR ( $\text{CDCl}_3$ )  $\delta$  34.73, 67.32, 106.72 (qd,  $J = 37.0, 5.6$  Hz), 121.08 (q,  $J = 270.5$  Hz), 126.97, 128.70, 128.84, 136.63, 151.99 (dq,  $J = 284.8, 4.9$  Hz), 158.57 (d,  $J = 33.9$  Hz); IR (neat) 3031 (w), 2963 (w), 1753 (vs), 1697 (vs), 1498 (m), 1396 (s), 1368 (s), 1287 (vs), 1183 (vs), 1141 (vs), 1076 (s), 910 (s)  $\text{cm}^{-1}$ ; HRMS (EI) Calcd for ( $\text{M}^+$ )  $\text{C}_{12}\text{H}_{10}\text{F}_4\text{O}_2$ : 262.0617, Found 262.0608.

### 3.3. 3-Phenyl-2-propen-1-yl 2,4,4,4-tetrafluorocrotonate (**4c-H**)

Yield: 42%;  $^1\text{H}$  NMR ( $\text{CDCl}_3$ )  $\delta$  4.95 (dd,  $J = 6.8, 1.0$  Hz, 2H), 6.30 (dq,  $J = 28.1, 7.5$  Hz, 1H), 6.30 (dt,  $J = 15.8, 6.8$  Hz, 1H), 6.74 (d,  $J = 15.8$  Hz, 1H), 7.25 ~ 7.38 (m, 3H), 7.39 ~ 7.43 (m, 2H);  $^{19}\text{F}$  NMR ( $\text{CDCl}_3, \text{CFCl}_3$ )  $\delta$  -111.17 (dq,  $J = 28.1, 16.9$  Hz, 1F), -59.79 (dd,  $J = 16.9, 7.5$  Hz, 1F); IR (neat) 3030 (m), 2957 (m), 1752 (vs), 1696 (vs), 1496 (s), 1449 (s), 1365 (vs), 1276 (vs), 1138 (vs), 1073 (vs), 967 (s)  $\text{cm}^{-1}$ ; HRMS (FAB) Calcd for ( $\text{M}^+$ )  $\text{C}_{13}\text{H}_{10}\text{F}_4\text{O}_2$ : 274.0617, Found 274.0615.

### 3.4. Benzyl 3-benzyl-2,4,4,4-tetrafluorocrotonate **3a** ( $\text{R}^1 = \text{Bn}$ )

Yield: 36%; **Z-3a** ( $\text{R}^1 = \text{Bn}$ ):  $^1\text{H}$  NMR ( $\text{CDCl}_3$ )  $\delta$  4.03 (s, 2H), 5.32 (s, 2H), 7.15 ~ 7.40 (m, 10H);  $^{19}\text{F}$  NMR ( $\text{CDCl}_3, \text{CFCl}_3$ )  $\delta$  -110.33 (q,  $J = 19.5$  Hz, 1F), -61.33 (d,  $J = 19.5$  Hz, 3F); **E-3a** ( $\text{R}^1 = \text{Bn}$ ):  $^1\text{H}$  NMR ( $\text{CDCl}_3$ )  $\delta$  3.70 (d,  $J = 4.0$  Hz, 2H), 5.31 (s, 2H), 7.15 ~ 7.40 (m, 10H);  $^{19}\text{F}$  NMR ( $\text{CDCl}_3, \text{CFCl}_3$ )  $\delta$  -109.85 ~ -109.70 (m, 1F), -59.10 (d,  $J = 9.8$  Hz, 3F); IR (neat) 3066 (w), 2962 (w), 1742 (vs), 1686 (m), 1497 (s), 1455 (s), 1347 (s), 1264 (vs), 1184 (vs), 1077 (m), 996 (w)  $\text{cm}^{-1}$ ; HRMS (FAB) Calcd for ( $\text{M}^+\text{Na}$ )  $\text{C}_{18}\text{H}_{14}\text{F}_4\text{O}_2\text{Na}$ : 361.0828, Found 361.0822.

### 3.5. Benzyl 4,4,4-trifluorobutynoate (**6a**)

$^1\text{H}$  NMR ( $\text{CDCl}_3$ )  $\delta$  5.29 (s, 2H), 7.35 ~ 7.43 (m, 5H);  $^{19}\text{F}$  NMR ( $\text{CDCl}_3, \text{CFCl}_3$ )  $\delta$  -52.69 (s, 3F);  $^{13}\text{C}$  NMR ( $\text{CDCl}_3$ )  $\delta$  68.98, 70.38 (q,  $J = 54.9$  Hz), 75.28 (q,  $J = 6.5$  Hz), 113.34 (q,  $J = 260.3$  Hz), 128.81, 128.81, 129.13, 133.64, 150.61 (q,  $J = 1.3$  Hz); IR (neat) 3037 (w), 2965 (m), 1732 (vs), 1608 (m), 1457 (m), 1376 (m), 1270 (vs), 1163 (vs), 1094 (m), 999 (m)  $\text{cm}^{-1}$ ; HRMS (EI) Calcd for ( $\text{M}^+$ )  $\text{C}_{11}\text{H}_7\text{F}_3\text{O}_2$ : 228.0398, Found 228.0393.

**4. Typical procedure for the preparation of benzyl 2,4,4,4-tetrafluoro-3-iodocrotonate (**4a** (*El* = I))**

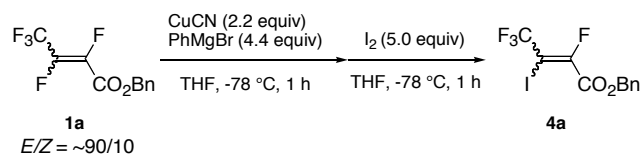

A 30 mL two-necked round bottomed flask equipped with a magnetic stirrer bar, a rubber septum and an inlet tube for argon was charged with a suspended solution of CuCN (2.2 equiv) in THF (1 mL). To this solution was slowly added a solution of phenylmagnesium bromide (4.4 equiv) in THF *via* a syringe at  $-78^\circ\text{C}$ . The whole was warmed up at  $-20^\circ\text{C}$  and stirred for 15 min. To the resulting solution was added benzyl 2,3,4,4,4-pentafluoro-2-butenate (**1a**, 1.0 equiv) *via* a syringe at  $-78^\circ\text{C}$ . After being stirred at  $-78^\circ\text{C}$  for 1 h, the reaction mixture was treated with iodine (5.0 equiv) in THF at  $-78^\circ\text{C}$  for 1 h. After stirring for 1 h, the reaction mixture was poured into ice-cooled saturated aqueous  $\text{NH}_4\text{Cl}$  (30 mL), followed by extraction with ether (30 mL  $\times$  5). The organic layers were dried over anhydrous sodium sulfate, filtered and concentrated with a rotary evaporator. Column chromatography of the residue using hexane/benzene (2:1) yielded pure benzyl 2,4,4,4-tetrafluoro-3-iodo-2-butenate (**4a** (*El* = I)).

**5.1. (*E*)-Benzyl 2,4,4,4-tetrafluoro-3-iodocrotonate (**4a** (*El* = I))**

Yield: 78%;  $^1\text{H}$  NMR ( $\text{CDCl}_3$ )  $\delta$  5.35 (s, 2H), 7.35 ~ 7.50 (m, 5H);  $^{19}\text{F}$  NMR ( $\text{CDCl}_3$ ,  $\text{CFCl}_3$ )  $\delta$  -80.78 (q,  $J = 24.4$  Hz, 1F), -58.25 (d,  $J = 24.4$  Hz, 1F);  $^{13}\text{C}$  NMR ( $\text{CDCl}_3$ )  $\delta$  68.81, 74.01 (qd,  $J = 30.7, 11.6$  Hz), 120.87 (q,  $J = 274.9$  Hz), 128.73, 128.74, 128.97, 133.89, 150.89 (dq,  $J = 294.1, 2.8$  Hz), 158.51 (d,  $J = 33.6$  Hz); IR (neat) 3069 (w), 2962 (w), 1743 (vs), 1627 (m), 1498 (m), 1312 (vs), 1237 (vs), 1187 (vs), 1147 (vs), 956 (s)  $\text{cm}^{-1}$ ; HRMS (FAB) Calcd for ( $\text{M}^+$ )  $\text{C}_{11}\text{H}_7\text{IF}_4\text{O}_2$ : 373.9427, Found 373.9438. Anal. Calcd for  $\text{C}_{11}\text{H}_7\text{F}_4\text{IO}_2$ : C, 35.32; H, 1.89. Found: C, 35.50; H, 1.92.

**5.2. (*Z*)-Benzyl 3-allyl-2,4,4,4-tetrafluorocrotonate (**4a** (*El* = allyl))**

Yield: 42%;  $^1\text{H}$  NMR ( $\text{CDCl}_3$ )  $\delta$  3.39 (dd,  $J = 2.5, 1.5$  Hz, 2H), 5.12 (dd,  $J = 10.0, 1.5$  Hz, 1H), 5.14 (dd,  $J = 16.5, 1.5$  Hz, 1H), 5.31 (s, 2H), 5.78 (dq,  $J = 16.5, 10.0$  Hz, 1H), 7.35 ~ 7.44 (m, 5H);  $^{19}\text{F}$  NMR ( $\text{CDCl}_3$ ,  $\text{CFCl}_3$ )  $\delta$  -111.38 (q,  $J = 19.6$  Hz, 1F), -62.10 (d,  $J = 19.6$  Hz,

1F);  $^{13}\text{C}$  NMR ( $\text{CDCl}_3$ )  $\delta$  29.18 (q,  $J = 1.6$  Hz), 68.10, 117.86, 121.43 (qd,  $J = 30.5$ , 5.8 Hz), 122.65 (q,  $J = 260.2$  Hz), 128.56, 128.75, 128.88, 132.25 (d,  $J = 3.6$  Hz), 134.27, 148.88 (dq,  $J = 281.4$ , 3.8 Hz), 159.35 (d,  $J = 32.9$  Hz); IR (neat) 3070 (w), 2961 (w), 1739 (vs), 1672 (m), 1499 (m), 1348 (vs), 1274 (vs), 1186 (s), 1143 (vs), 1097 (s), 968 (m)  $\text{cm}^{-1}$ ; HRMS (EI) Calcd for ( $\text{M}^+$ )  $\text{C}_{14}\text{H}_{12}\text{F}_4\text{O}_2$ : 288.0773, Found 288.0760.

### 5.3. (Z)-Benzyl 2,4,4,4-tetrafluoro-3-methallylcrotonate (**4a** ( $El = \text{methallyl}$ )))

Yield: 62%;  $^1\text{H}$  NMR ( $\text{CDCl}_3$ )  $\delta$  1.73 (s, 3H), 3.35 (brs, 2H), 4.71 (brs, 1H), 4.86 (brs, 1H), 5.30 (s, 2H), 7.25 ~ 7.45 (m, 5H);  $^{19}\text{F}$  NMR ( $\text{CDCl}_3$ ,  $\text{CFCl}_3$ )  $\delta$  -110.29 (q,  $J = 19.5$  Hz, 1F), -62.25 (d,  $J = 19.5$  Hz, 1F);  $^{13}\text{C}$  NMR ( $\text{CDCl}_3$ )  $\delta$  22.51, 32.65 (q,  $J = 3.8$  Hz), 68.08, 112.06, 121.37 (qd,  $J = 29.6$ , 5.7 Hz), 122.54 (q,  $J = 276.8$  Hz), 128.53, 128.73, 128.85, 134.25, 130.41 (d,  $J = 3.5$  Hz), 149.47 (dq,  $J = 279.4$ , 2.8 Hz), 159.32 (d,  $J = 33.9$  Hz); IR (neat) 3037 (w), 2975 (w), 1740 (vs), 1670 (m), 1456 (m), 1347 (s), 1277 (vs), 1220 (s), 1143 (vs), 1120 (m), 969 (w)  $\text{cm}^{-1}$ ; HRMS (EI) Calcd for ( $\text{M}^+$ )  $\text{C}_{15}\text{H}_{14}\text{F}_4\text{O}_2$ : 302.0930, Found 302.0920.

### 5.4. (Z)-Benzyl 3-crotyl-2,4,4,4-tetrafluorocrotonate (**4a** ( $El = \text{crotyl}$ )))

Yield: 58%;  $^1\text{H}$  NMR ( $\text{CDCl}_3$ )  $\delta$  1.65 (d,  $J = 6.4$  Hz, 3H), 3.31 (d,  $J = 6.2$  Hz, 2H), 5.31 (s, 2H), 5.37 (dt,  $J = 16.0$ , 6.2 Hz, 1H), 5.56 (dq,  $J = 16.0$ , 6.2 Hz, 1H), 7.35 ~ 7.45 (m, 5H);  $^{19}\text{F}$  NMR ( $\text{CDCl}_3$ ,  $\text{CFCl}_3$ )  $\delta$  -112.42 (q,  $J = 18.8$  Hz, 1F), -61.99 (d,  $J = 18.8$  Hz, 1F);  $^{13}\text{C}$  NMR ( $\text{CDCl}_3$ )  $\delta$  17.83, 28.15 (q,  $J = 9.4$  Hz), 68.00, 122.22 (qd,  $J = 29.6$ , 4.9 Hz), 122.67 (q,  $J = 274.9$  Hz), 124.65 (d,  $J = 3.6$  Hz), 128.56, 128.73, 128.84, 128.97, 134.34, 148.45 (dq,  $J = 272.1$ , 3.6 Hz), 159.45 (d,  $J = 33.9$  Hz); IR (neat) 3035 (w), 2965 (w), 1740 (vs), 1672 (m), 1456 (m), 1348 (vs), 1266 (vs), 1210 (s), 1143 (vs), 1122 (vs), 1099 (s), 967 (s)  $\text{cm}^{-1}$ ; HRMS (EI) Calcd for ( $\text{M}^+$ )  $\text{C}_{15}\text{H}_{14}\text{F}_4\text{O}_2$ : 302.0930, Found 302.0935.

## 6. Typical procedure for the preparation of benzyl 4,4,4-trifluoro-3-phenylcrotonate (**5a**)

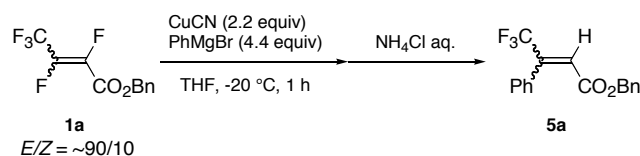

A 30 mL-two necked round bottomed flask equipped with a magnetic stirrer bar, a rubber septum and an inlet tube for argon was charged with a suspended solution of CuCN (2.2

equiv) in THF (1 mL). To this solution was slowly added a solution of phenylmagnesium bromide (4.4 equiv) in THF *via* a syringe at -78 °C. The whole was warmed up at -20 °C and stirred for 15 min. To the resulting solution was added benzyl 2,3,4,4,4-pentafluoro-2-butenate (**1a**, 1.0 equiv) *via* a syringe at -78 °C. After stirring at -20 °C for 1 h, the reaction mixture was poured into ice-cooled saturated aqueous NH<sub>4</sub>Cl (30 mL), followed by extraction with ether (30 mL × 5). The organic layers were dried over anhydrous sodium sulfate, filtered and concentrated with a rotary evaporator. Column chromatography of the residue using hexane/benzene (2:1) yielded pure benzyl 4,4,4-trifluoro-3-phenylcrotonate (**5a**).

#### 7.1. Benzyl 4,4,4-trifluoro-3-phenylcrotonate (**5a**)

Yield: 76%; *E*-**5a** : <sup>1</sup>H NMR (CDCl<sub>3</sub>) δ 5.27 (s, 2H), 6.37 (s, 2H), 7.35 ~ 7.45 (m, 10H); <sup>19</sup>F NMR (CDCl<sub>3</sub>, CFCl<sub>3</sub>) δ -60.52 (s, 3F); *Z*-**5a** : <sup>1</sup>H NMR (CDCl<sub>3</sub>) δ 5.02 (s, 2H), 6.65 (q, *J* = 1.2 Hz, 2H), 7.35 ~ 7.45 (m, 10H); <sup>19</sup>F NMR (CDCl<sub>3</sub>, CFCl<sub>3</sub>) δ -68.03 (s, 3F); IR (neat) 3065 (m), 3036 (m), 1736 (vs), 1656 (m), 1448 (s), 1364 (vs), 1284 (vs), 1170 (vs), 1128 (vs), 1003 (s), 949 (m) cm<sup>-1</sup>; HRMS (FAB) Calcd for (M+H) C<sub>17</sub>H<sub>14</sub>F<sub>3</sub>O<sub>2</sub>: 307.0947, Found 307.0951.

#### Reference

- (1) Ishihara, T.; Maekawa, T.; Yamasaki, Y.; Ando, T. *J. Fluorine Chem.* **1987**, *34*, 323-335.
- (2) Tiers, G.V.D. *J. Org. Chem.* **1964**, *29*, 2038-2039.
- (3) Ishihara, T.; Yamasaki, Y.; Ando, T. *Tetrahedron Lett.* **1986**, *27*, 2879-2880.

# Benzyl ester(1a)

DRILE  
COMNT  
DATIM  
OBNUC  
EXMOD  
OBFRO  
OBSET  
OBFIN  
POINT  
FREQU  
SCANS  
ACQTM  
PD  
PW1  
IRNUC  
CTEMP  
SLVNT  
EXREF  
BF  
RGAIN

FID  
Benzyl ester(1a)  
Sat Nov 26 18:06:28 2005  
1H  
zg30  
500.13 MHz  
3.08 KHz  
8.51 Hz  
32768  
10330.58 Hz  
16  
0.0000 sec  
0.0000 sec  
10.00 usec  
297.1 c  
CDCl3  
7.26 ppm  
0.10 Hz  
574

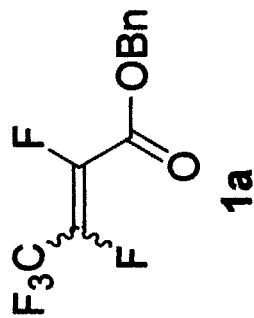

7.414  
7.411  
7.408  
7.402  
7.395  
7.391  
7.388  
7.260  
5.374  
5.344

PPM

# Benzyl Ester (1a)

DFILE Benzyl ester(C).als  
 COMNT Benzyl Ester (1a)  
 DATIM Sat Nov 19 17:38:04 2005  
 OBNUC 13C  
 zpgp30  
 OBFRQ 125.77 MHz  
 OBSET 0.36 KHz  
 OBFIN 4.30 Hz  
 POINT 32768  
 FREQU 30030.03 Hz  
 SCANS 256  
 ACQTM 0.0000 sec  
 PD 0.0000 sec  
 PW1 10.00 usec  
 IRNUC 297.0 c  
 CTEMP CDC13  
 SLVNT 77.00 ppm  
 EXREF 1.00 Hz  
 BF 3649  
 RGAIN

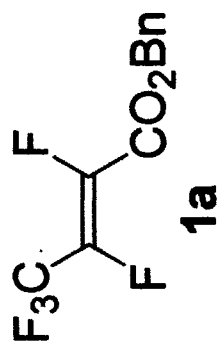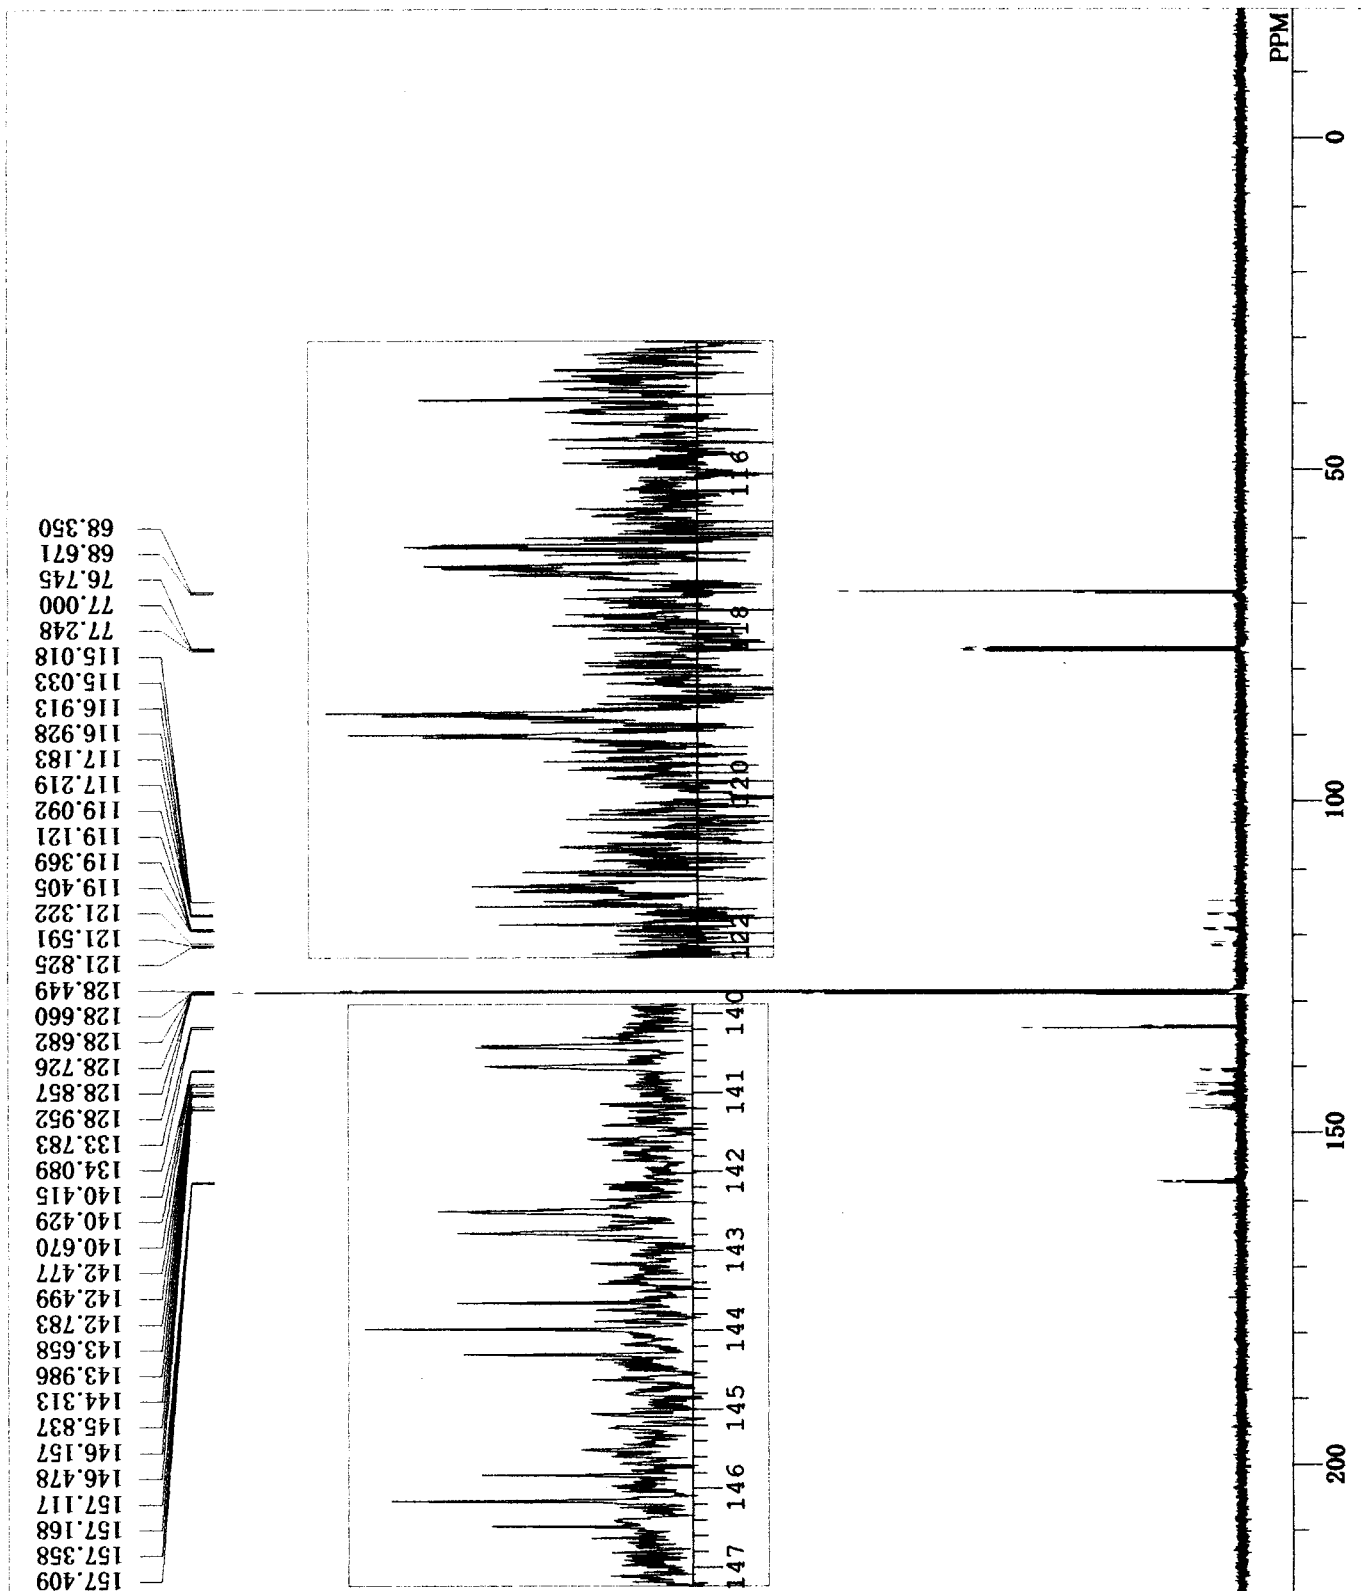

# Phenethyl ester(1b)

DFILE  
 COMNT Phenethyl ester(1b)  
 DATIM Sat Feb 24 17:01:33 2007  
 OBNUC 1H  
 zg30  
 500.13 MHz  
 3.08 KHz  
 8.51 Hz  
 32768  
 10330.58 Hz  
 16  
 0.0000 sec  
 0.0000 sec  
 10.00 usec  
 294.1 c  
 CDC13  
 7.26 ppm  
 0.10 Hz  
 812  
 EXMOD  
 OBFREQ  
 OBSET  
 OBFIN  
 POINT  
 FREQU  
 SCANS  
 ACQTM  
 PD  
 PW1  
 IRNUC  
 CTEMP  
 SLVNT  
 EXREF  
 BF  
 RGAIN

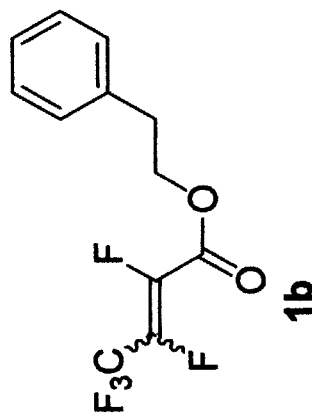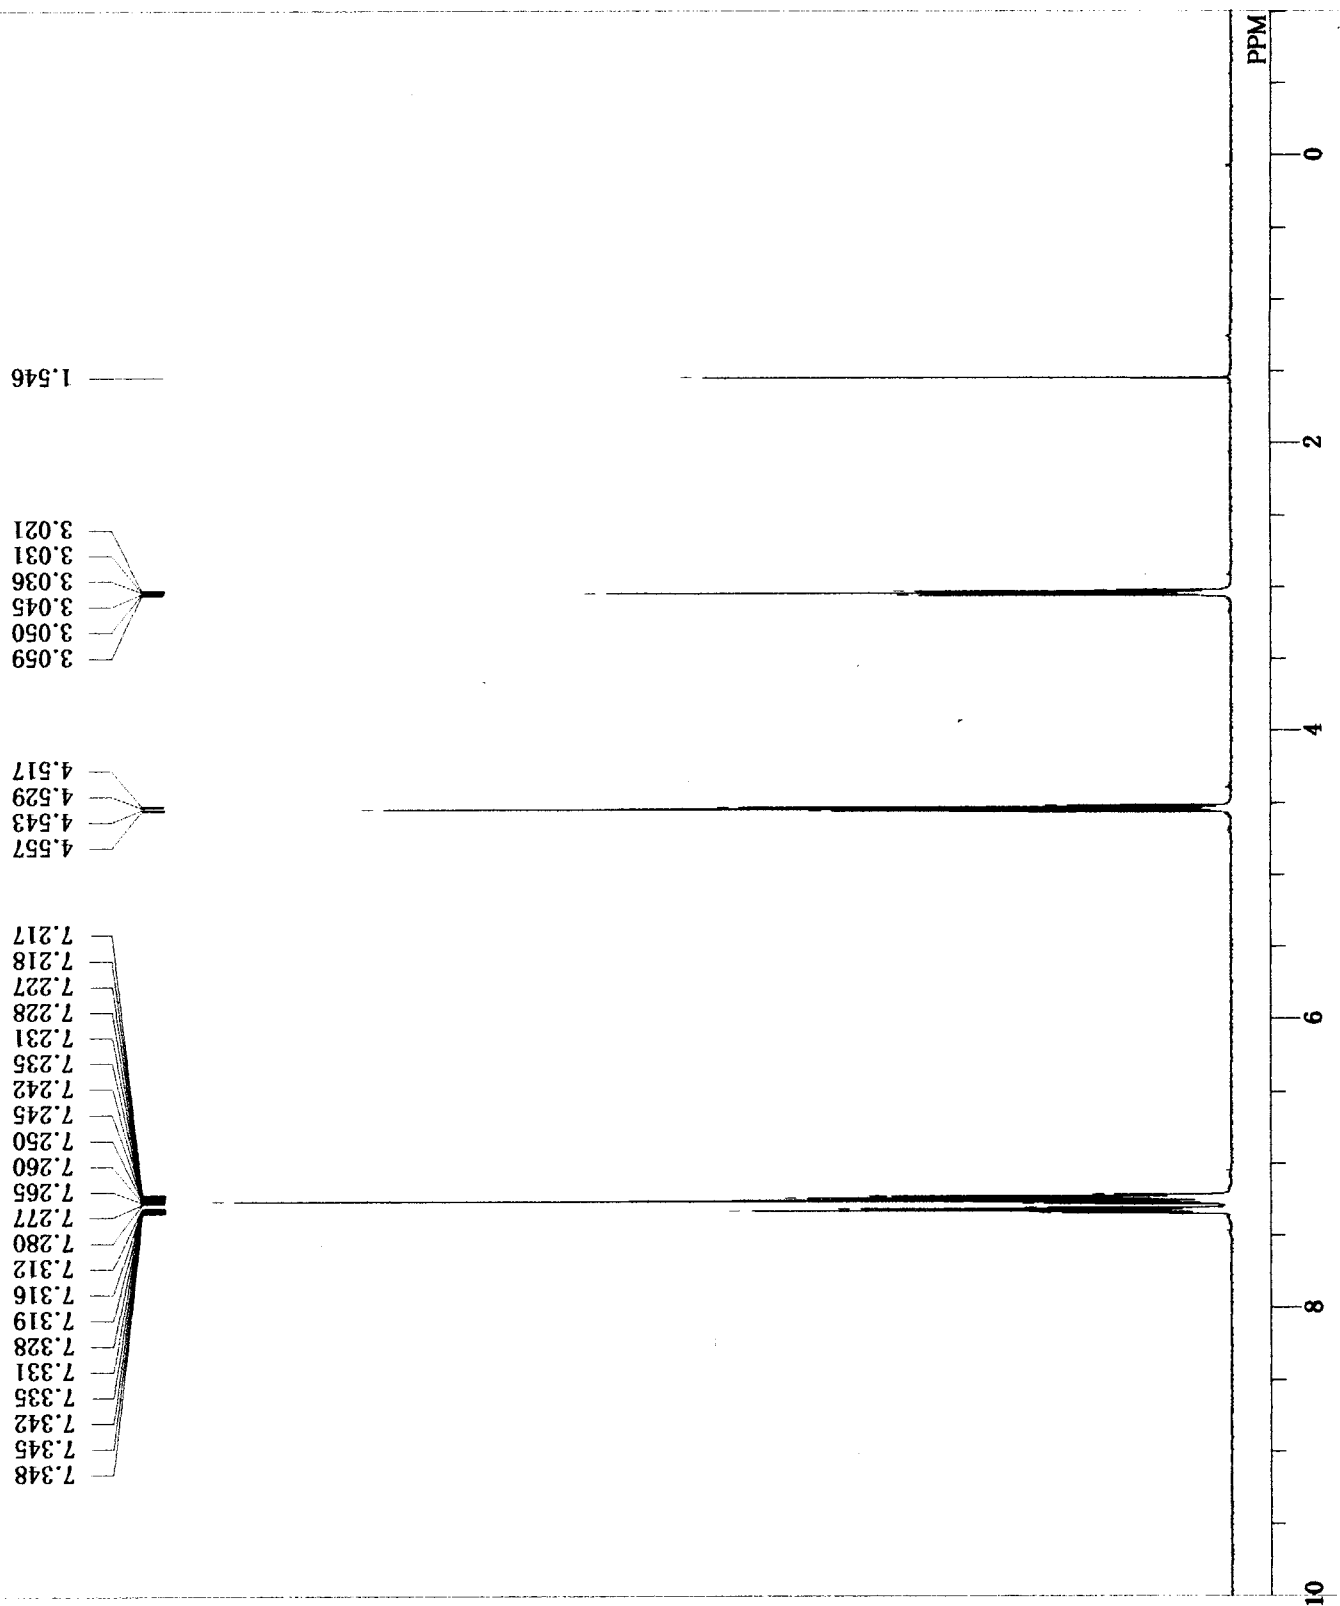

# Phenethyl ester(1b)

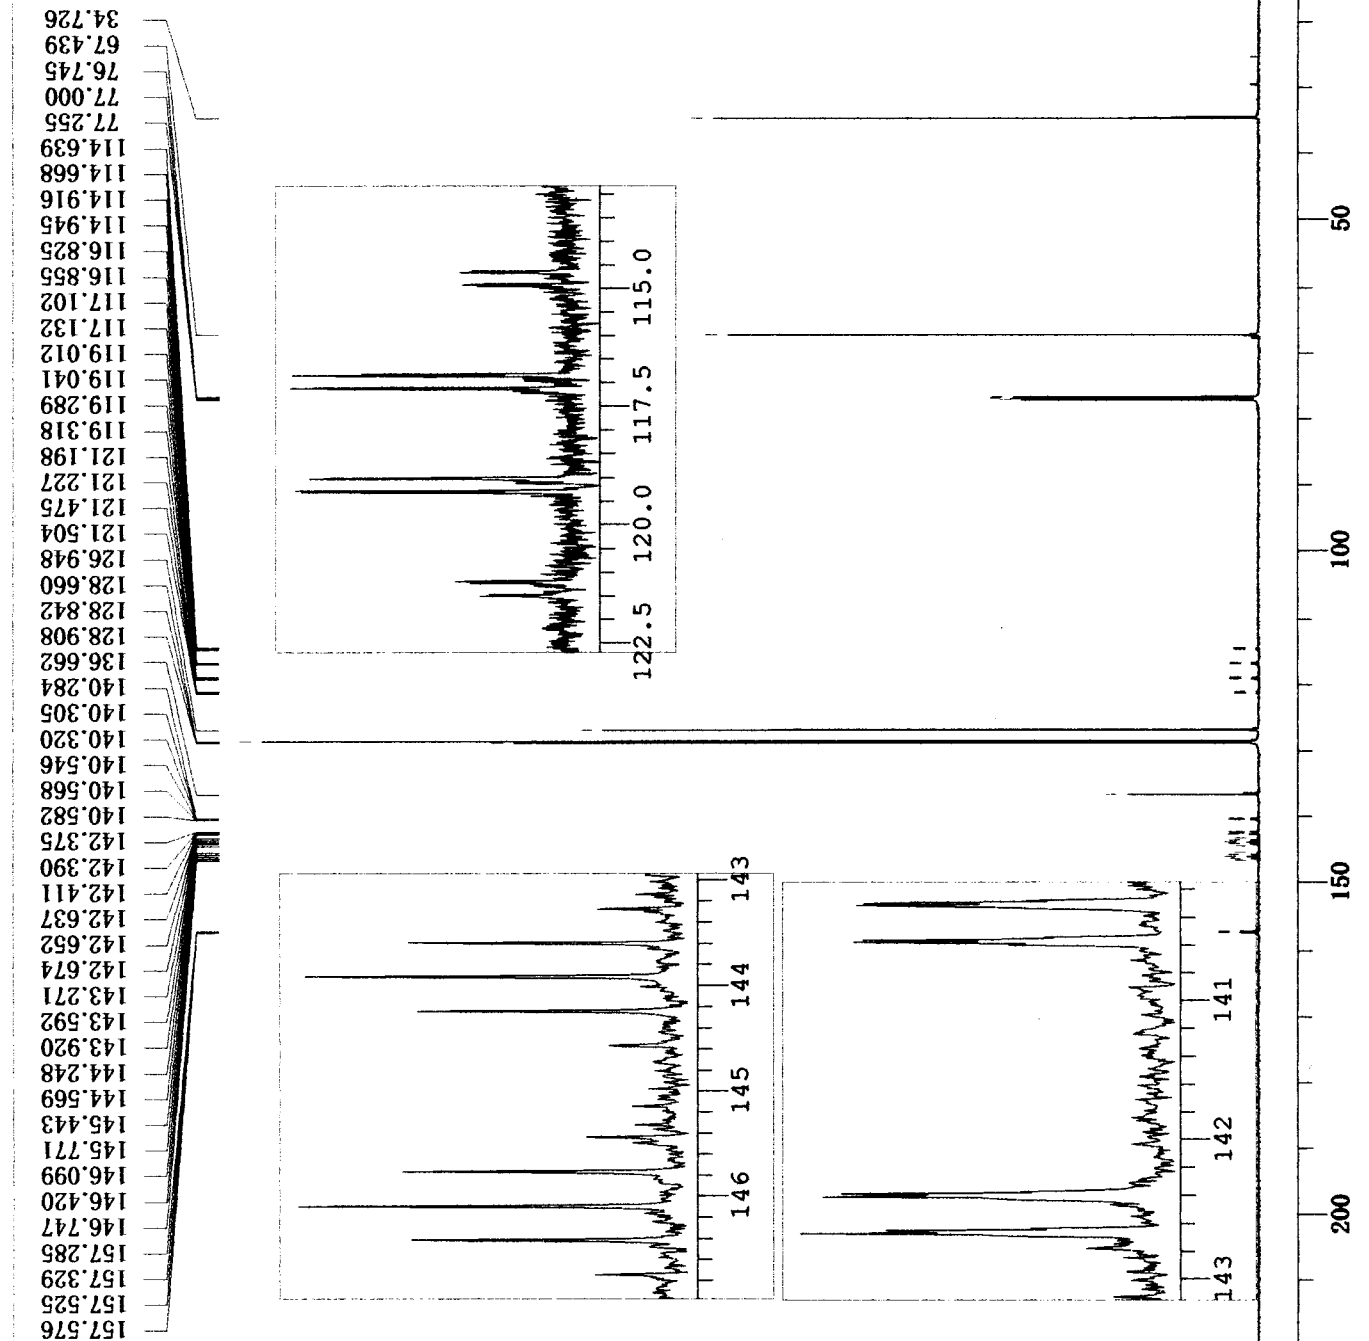

DFILE phenethyl ester(C).als  
 COMNT Phenethyl ester(1b)  
 DATIM Wed Feb 21 09:22:11 200;  
 OBNUC 13C  
 EXMOD zgpg30  
 OBFRQ 125.77 MHz  
 OBSET 0.36 KHz  
 OBFIN 4.30 Hz  
 POINT 32768  
 FREQU 30030.03 Hz  
 SCANS 25600  
 ACQTM 0.0000 sec  
 PD 0.0000 sec  
 PW1 10.00 usec  
 IRNUC 294.1 c  
 CDC13  
 SLVNT 77.00 ppm  
 EXREF 1.00 Hz  
 BF 1625  
 RGAIN

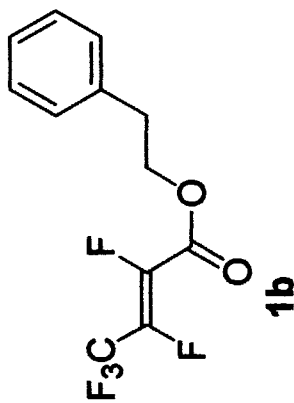

# Cinnamyl ester (1c)

DFILE  
COMNT  
DATIM  
OBNUC  
EXMOD  
OBFRQ  
OBSET  
OBFIN  
POINT  
FREQU  
SCANS  
ACQTM  
PD  
PW1  
IRNUC  
CTEMP  
SLVNT  
EXREF  
BF  
RGAIN

fid  
Cinnamyl ester (1c)  
Wed Feb 21 21:14:33 2007  
1H  
zg30  
500.13 MHz  
3.08 KHz  
8.51 Hz  
32768  
10330.58 Hz  
16  
0.0000 sec  
0.0000 sec  
10.00 usec  
294.4 c  
CDCl3  
7.26 ppm  
0.10 Hz  
1024

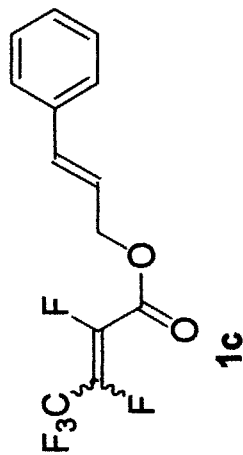

7.422  
7.419  
7.415  
7.404  
7.361  
7.358  
7.348  
7.344  
7.332  
7.312  
7.310  
7.307  
7.300  
7.295  
7.260  
6.773  
6.742  
6.341  
6.328  
6.314  
6.309  
6.296  
6.283  
5.005  
5.003  
4.992  
4.990  
4.983  
4.981  
4.970  
4.967

1.546

PPM  
10  
8  
6  
4  
2  
0

# Cinnamyl Ester(1c)

DFILE cinnamyl ester(C).als  
 COMNT Cinnamyl Ester(1c)  
 DATIM Tue Feb 27 09:39:19 2007  
 OBNUC 13C  
 EXMOD zgpg30  
 OBFRQ 125.77 MHz  
 OBSET 0.36 KHz  
 OBFIN 4.30 Hz  
 POINT 32768  
 FREQU 30030.03 Hz  
 SCANS 25600  
 ACQTM 0.0000 sec  
 PD 0.0000 sec  
 PW1 10.00 usec  
 IRNUC 294.8 c  
 CTEMP CDC13  
 SLVNT 77.00 ppm  
 EXREF 1.00 Hz  
 BF 3649  
 RGAIN

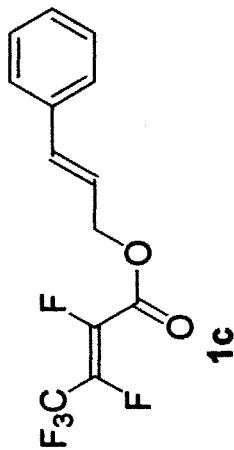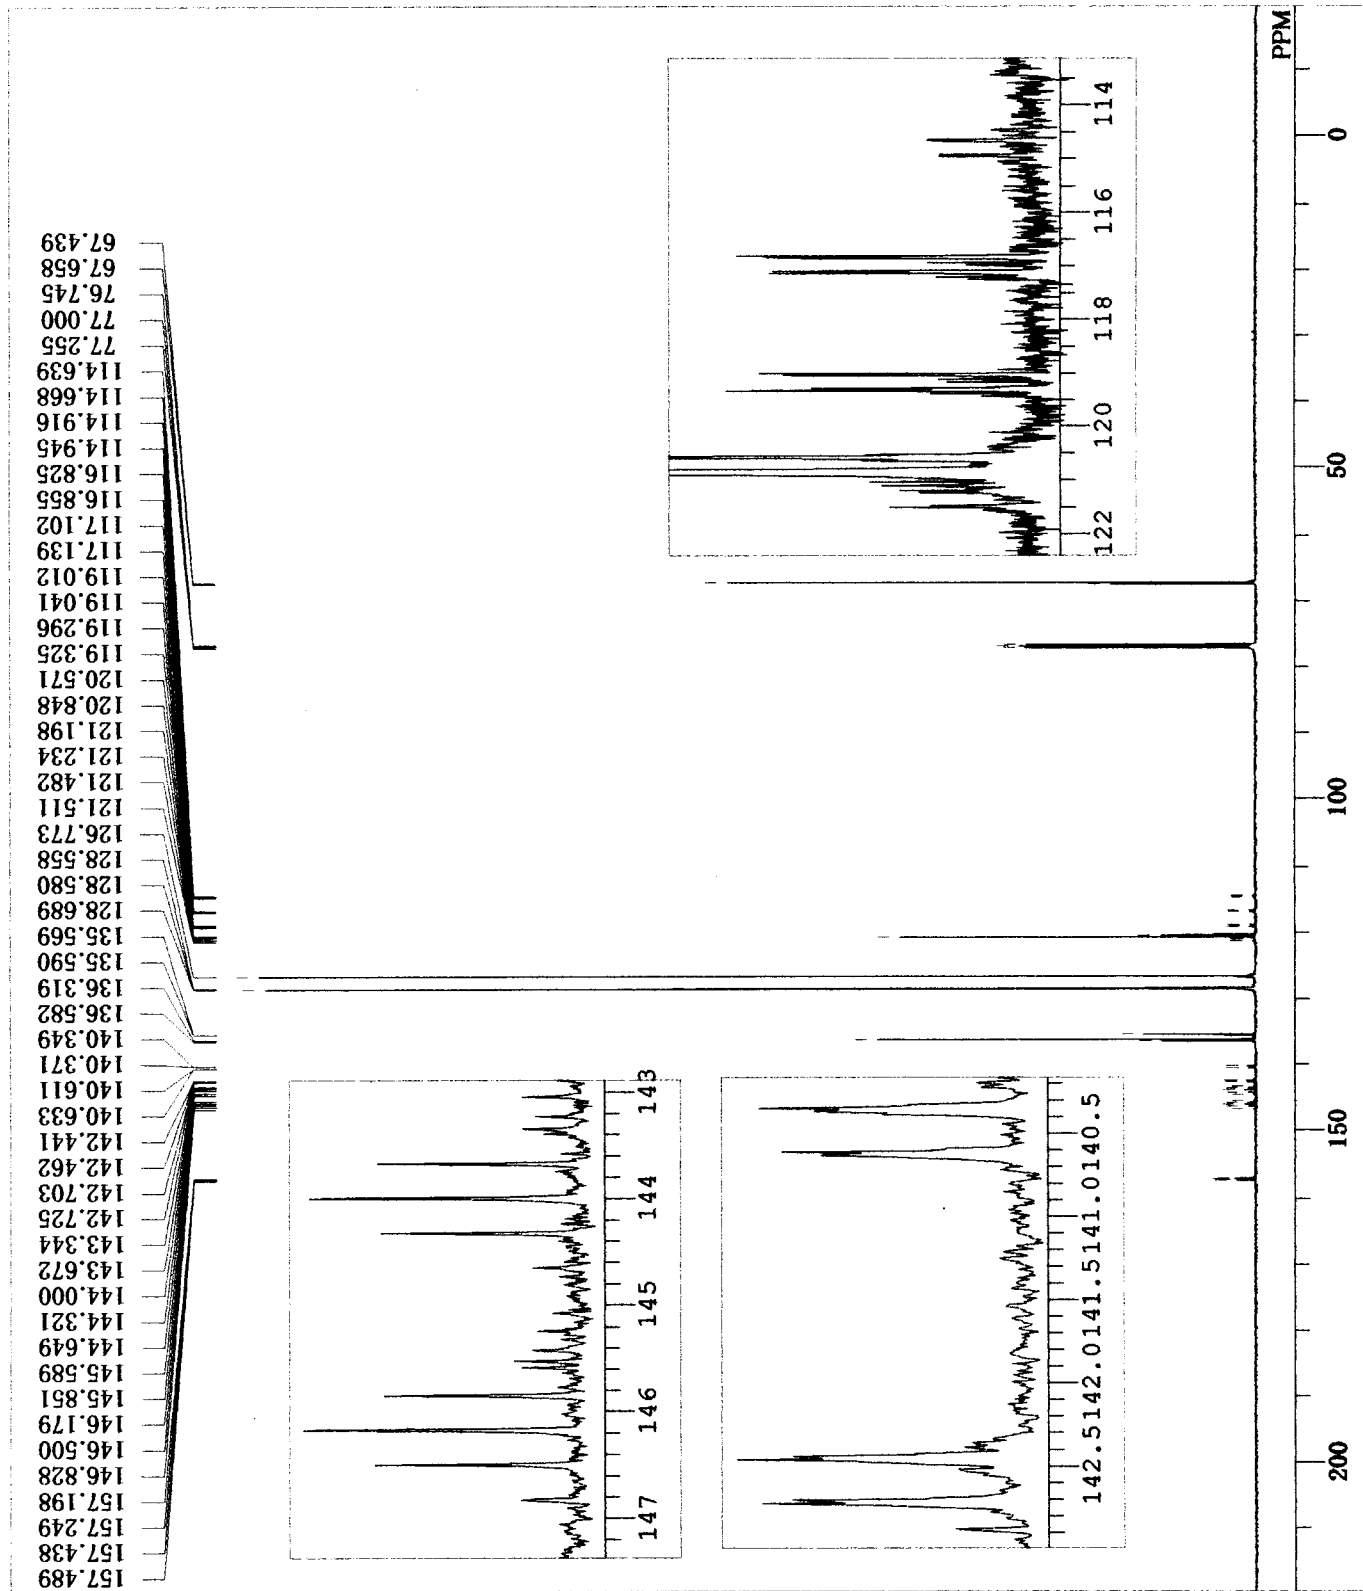

# Benzyl ester(reduction product)(4a-H)

DRILE  
COMNT  
DATM  
OBNUC  
EXMOD  
OBFRRQ  
OBSET  
OBFIN  
POINT  
FREQU  
SCANS  
ACQTM  
PD  
PW1  
IRNUC  
CTEMP  
SLVNT  
EXREF  
BF  
RGAIN

FID  
Benzyl ester(reduction prc  
Wed Feb 22 20:45:19 2004  
1H  
zg30  
500.13 MHz  
3.08 KHz  
8.51 Hz  
32768  
10330.58 Hz  
16  
0.0000 sec  
0.0000 sec  
10.00 usec  
295.7 c  
CDCl3  
7.26 ppm  
0.10 Hz  
512

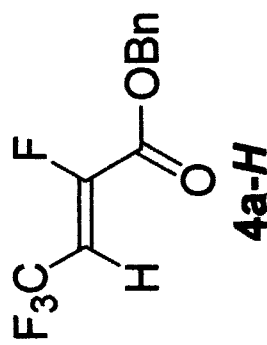

0.075

1.560

5.318

6.226  
6.241  
6.255  
6.270  
6.282  
6.297  
6.311  
6.326  
7.260  
7.375  
7.378  
7.385  
7.389  
7.394  
7.400  
7.405  
7.408

PPM

# Benzyl ester(reduction product)

DFILE  
COMNT  
DATIM  
OBNUC  
EXMOD  
OBFRQ  
OBSET  
OBFIN  
POINT  
FREQU  
SCANS  
ACQTM  
PD  
PW1  
IRNUC  
CTEMP  
SLVNT  
EXREF  
BF  
RGAIN

Benzyl(reduction)(C).als  
Benzyl ester(reduction prc  
Sat Feb 25 20:33:54 2006  
13C  
zgpg30  
125.77 MHz  
0.36 KHz  
4.30 Hz  
32768  
30030.03 Hz  
256  
0.0000 sec  
0.0000 sec  
10.00 usec  
295.9 c  
CDCl3  
77.00 ppm  
1.00 Hz  
3649

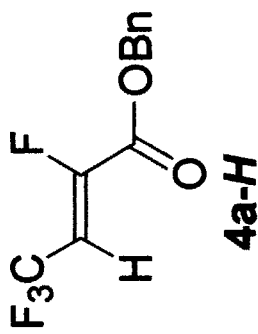

77.255  
77.000  
76.745  
68.627

158.691  
158.422  
153.168  
153.124  
153.080  
153.051  
150.901  
150.865  
150.821  
150.777  
133.987  
129.046  
128.799  
128.697  
128.580  
128.412  
124.295  
122.153  
119.995  
117.846  
107.417  
107.374  
107.126  
107.082  
106.827  
106.783  
106.536  
106.485

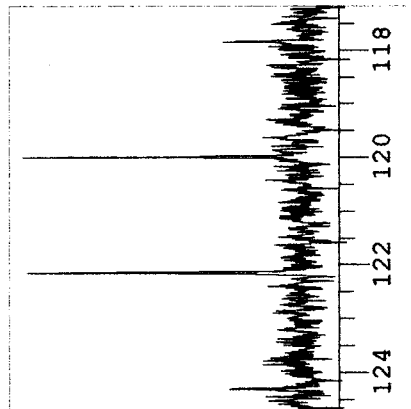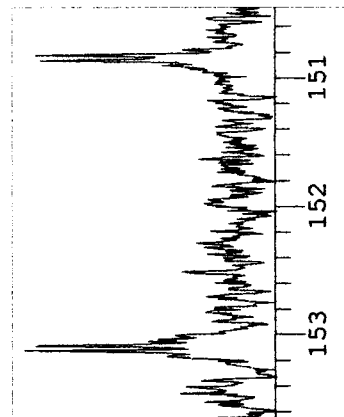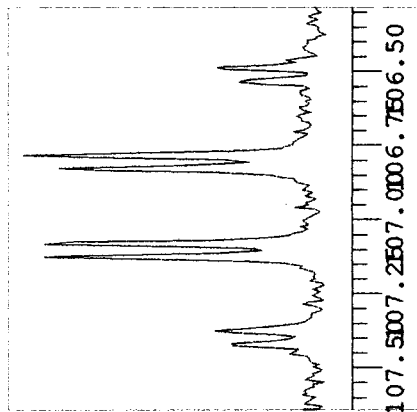

PPM  
200  
150  
100  
50  
0

# Phenethyl ester(reduction product)(4b-H)

DRILE  
COMNT  
DATIM  
OBNUC  
EXMOD  
OBRQ  
OBSET  
OBFIN  
POINT  
FREQU  
SCANS  
ACQTM  
PD  
PW1  
IRNUC  
CTEMP  
SLVNT  
EXREF  
BF  
RGAIN

fid  
Phenethyl ester(reduction  
Sat Feb 24 15:42:34 2007  
1H  
zg30  
500.13 MHz  
3.08 KHz  
8.51 Hz  
32768  
10330.58 Hz  
16  
0.0000 sec  
0.0000 sec  
10.00 usec  
294.3 c  
CDCl3  
0.00 ppm  
1.00 Hz  
128

3.036  
3.022  
3.008

4.512  
4.501  
4.488  
4.473

7.339  
7.325  
7.310  
7.295  
7.273  
7.258  
7.244  
7.225  
7.211  
6.234  
6.219  
6.178  
6.162

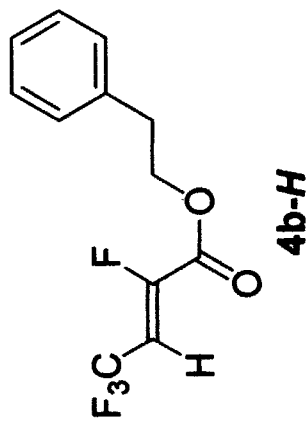

PPM

10 8 6 4 2 0

# Phenethyl ester(reduction product)(4b-H)

Phenethyl(reduction)(C).al  
 Phenethyl ester(reduction  
 Sat Feb 24 15:51:23 2007  
 13C  
 zgpg30

DFILE  
 COMNT  
 DATIM  
 OBNUC  
 EXMOD  
 OBFRQ  
 OBSET  
 OBFIN  
 POINT  
 FREQU  
 SCANS  
 ACQTM  
 PD  
 PW1  
 IRNUC  
 CTEMP  
 SLVNT  
 EXREF  
 BF  
 RGAIN

125.77 MHz  
 0.36 KHz  
 4.30 Hz  
 32768  
 30030.03 Hz  
 256  
 0.0000 sec  
 0.0000 sec  
 10.00 usec  
 294.7 c  
 CDCl3  
 77.00 ppm  
 1.00 Hz  
 3649

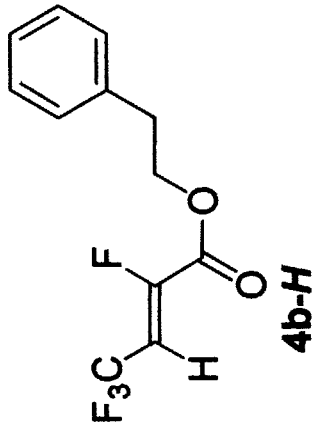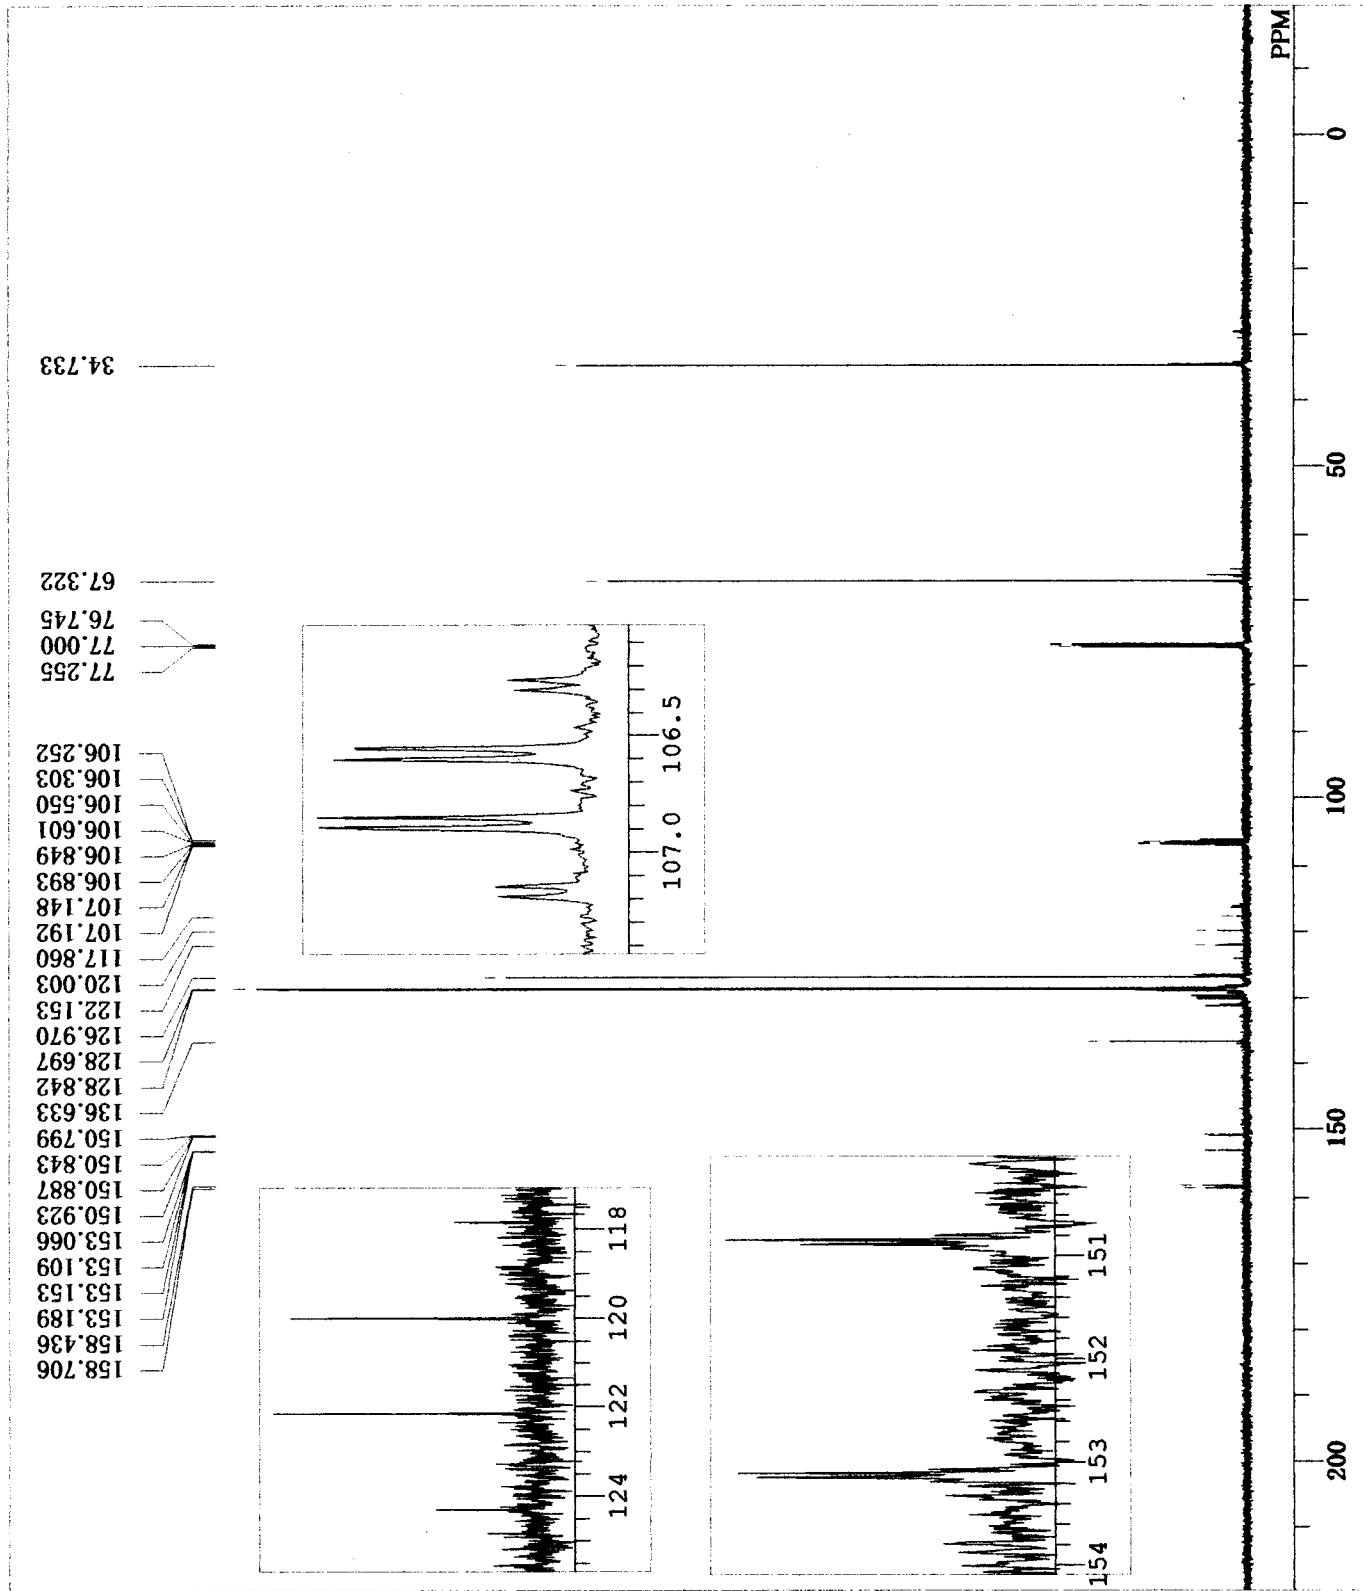

# Cinnamyl ester(reduction product)(4c-H)

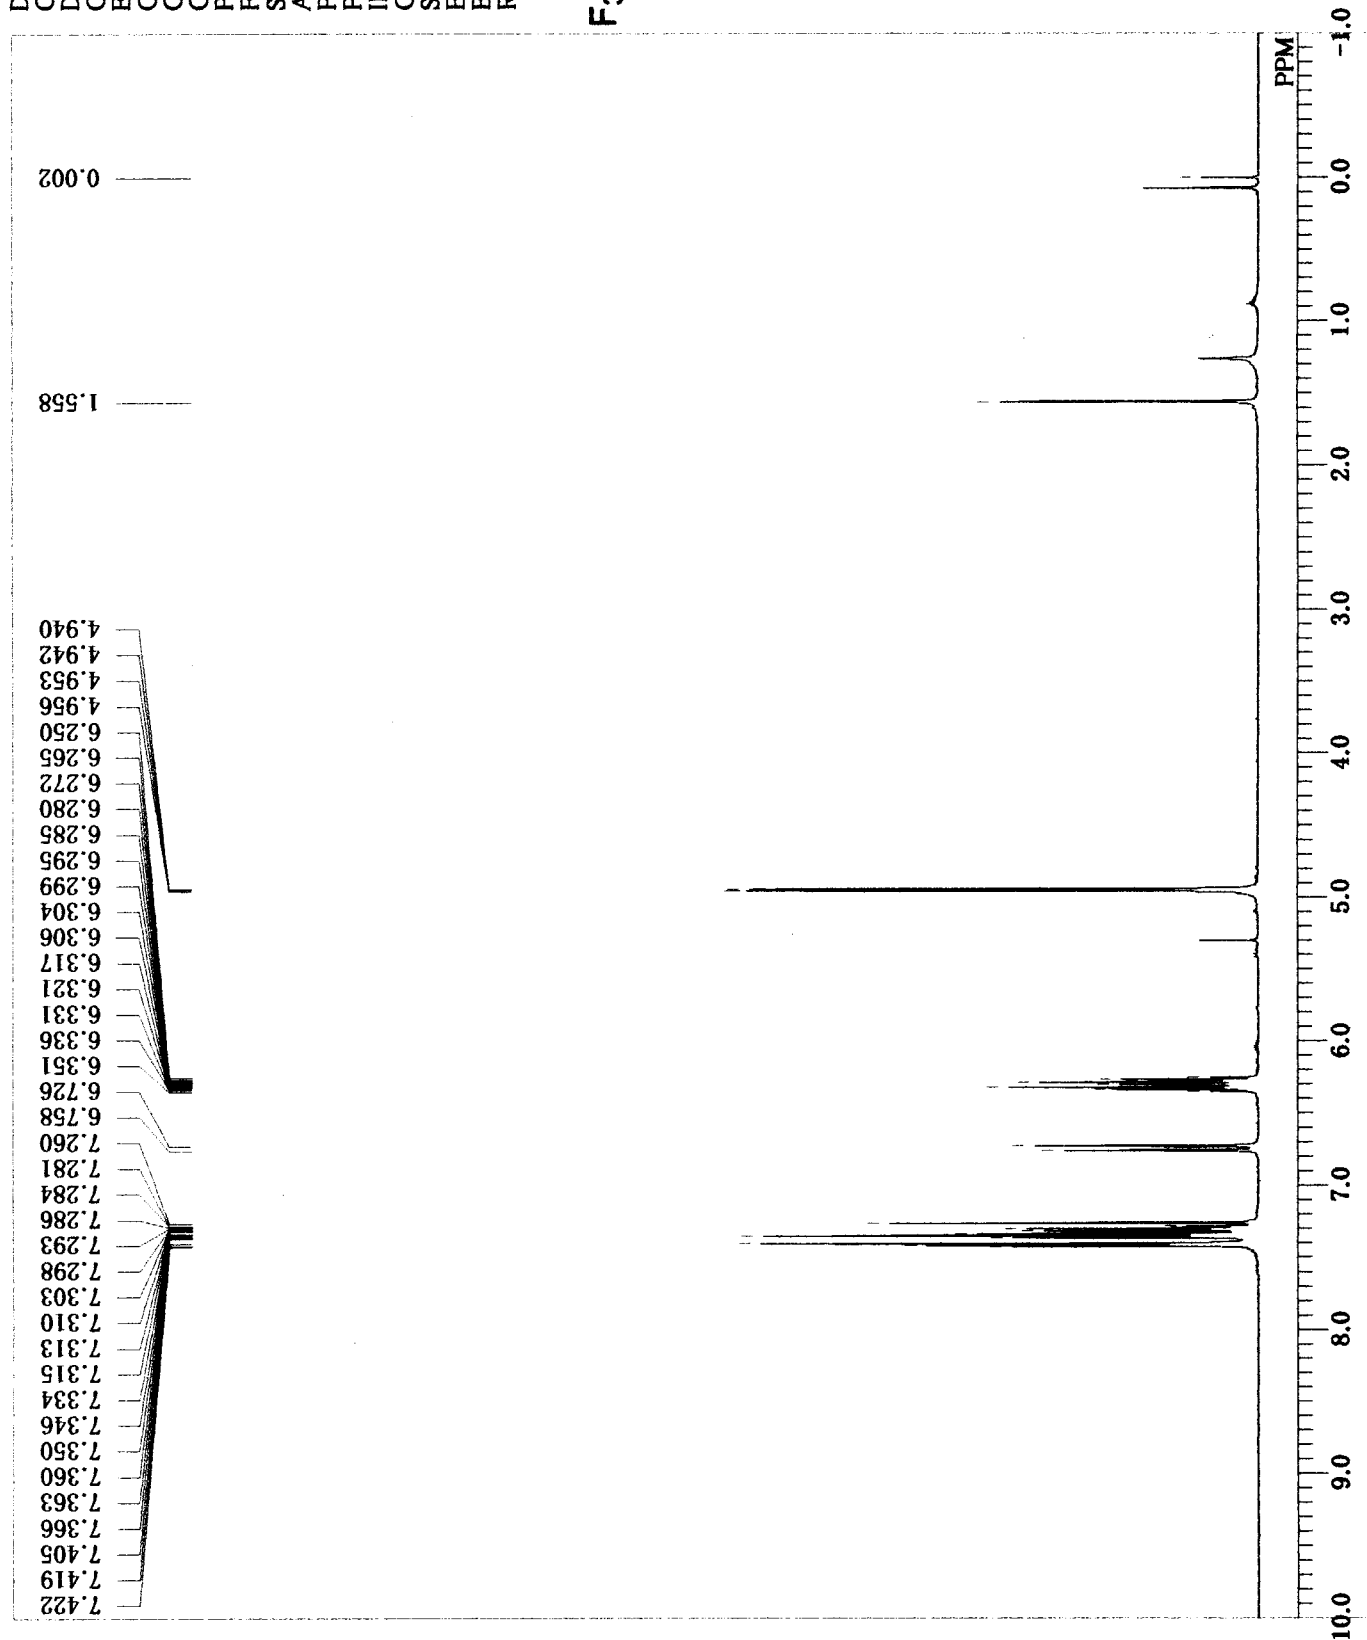

DFIL  
 COMNT Cinnamyl ester(reduction p  
 DATIM Fri Feb 23 18:10:52 2007  
 OBNUC 1H  
 EXMOD zg30  
 OBFRQ 500.13 MHz  
 OBSET 3.08 KHz  
 OBFIN 8.51 Hz  
 POINT 32768  
 FREQU 10330.58 Hz  
 SCANS 16  
 ACQTM 0.0000 sec  
 PD 0.0000 sec  
 PW1 10.00 usec  
 IRNUC 294.7 c  
 CTEMP CDC13  
 SLVNT 7.26 ppm  
 EXREF 0.10 Hz  
 BF 512  
 RGAIN

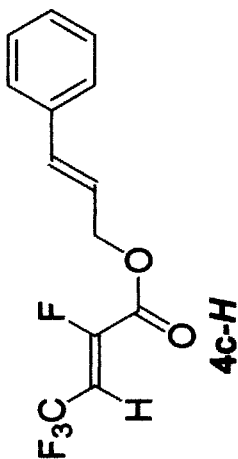

# Addition-elimination product(3a)

DFILE COMNT  
 DATIM  
 OBNUC  
 EXMOD  
 OBRQ  
 OBSET  
 OBFIN  
 POINT  
 FREQU  
 SCANS  
 ACQTM  
 PD  
 PW1  
 IRNUC  
 CTEMP  
 SLVNT  
 EXREF  
 BF  
 RGAIN

FID  
 Addition-elimination produ  
 Fri Jun 30 20:25:07 2006  
 1H  
 zg30  
 500.13 MHz  
 3.08 KHz  
 8.51 Hz  
 32768  
 10330.58 Hz  
 16  
 0.0000 sec  
 0.0000 sec  
 10.00 usec  
 299.6 c  
 CDCl3  
 7.26 ppm  
 0.10 Hz  
 287

7.291  
 7.287  
 7.285  
 7.282  
 7.277  
 7.276  
 7.266  
 7.260  
 7.199  
 7.196  
 7.183  
 7.179  
 7.176  
 7.164  
 7.144  
 7.138  
 7.128  
 7.113  
 7.097  
 7.087  
 7.072  
 5.211  
 5.204

3.931  
 3.604  
 3.596

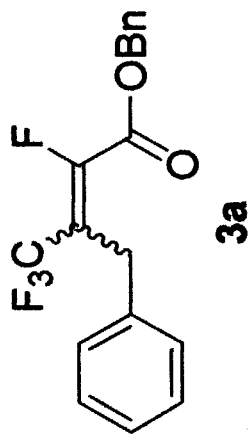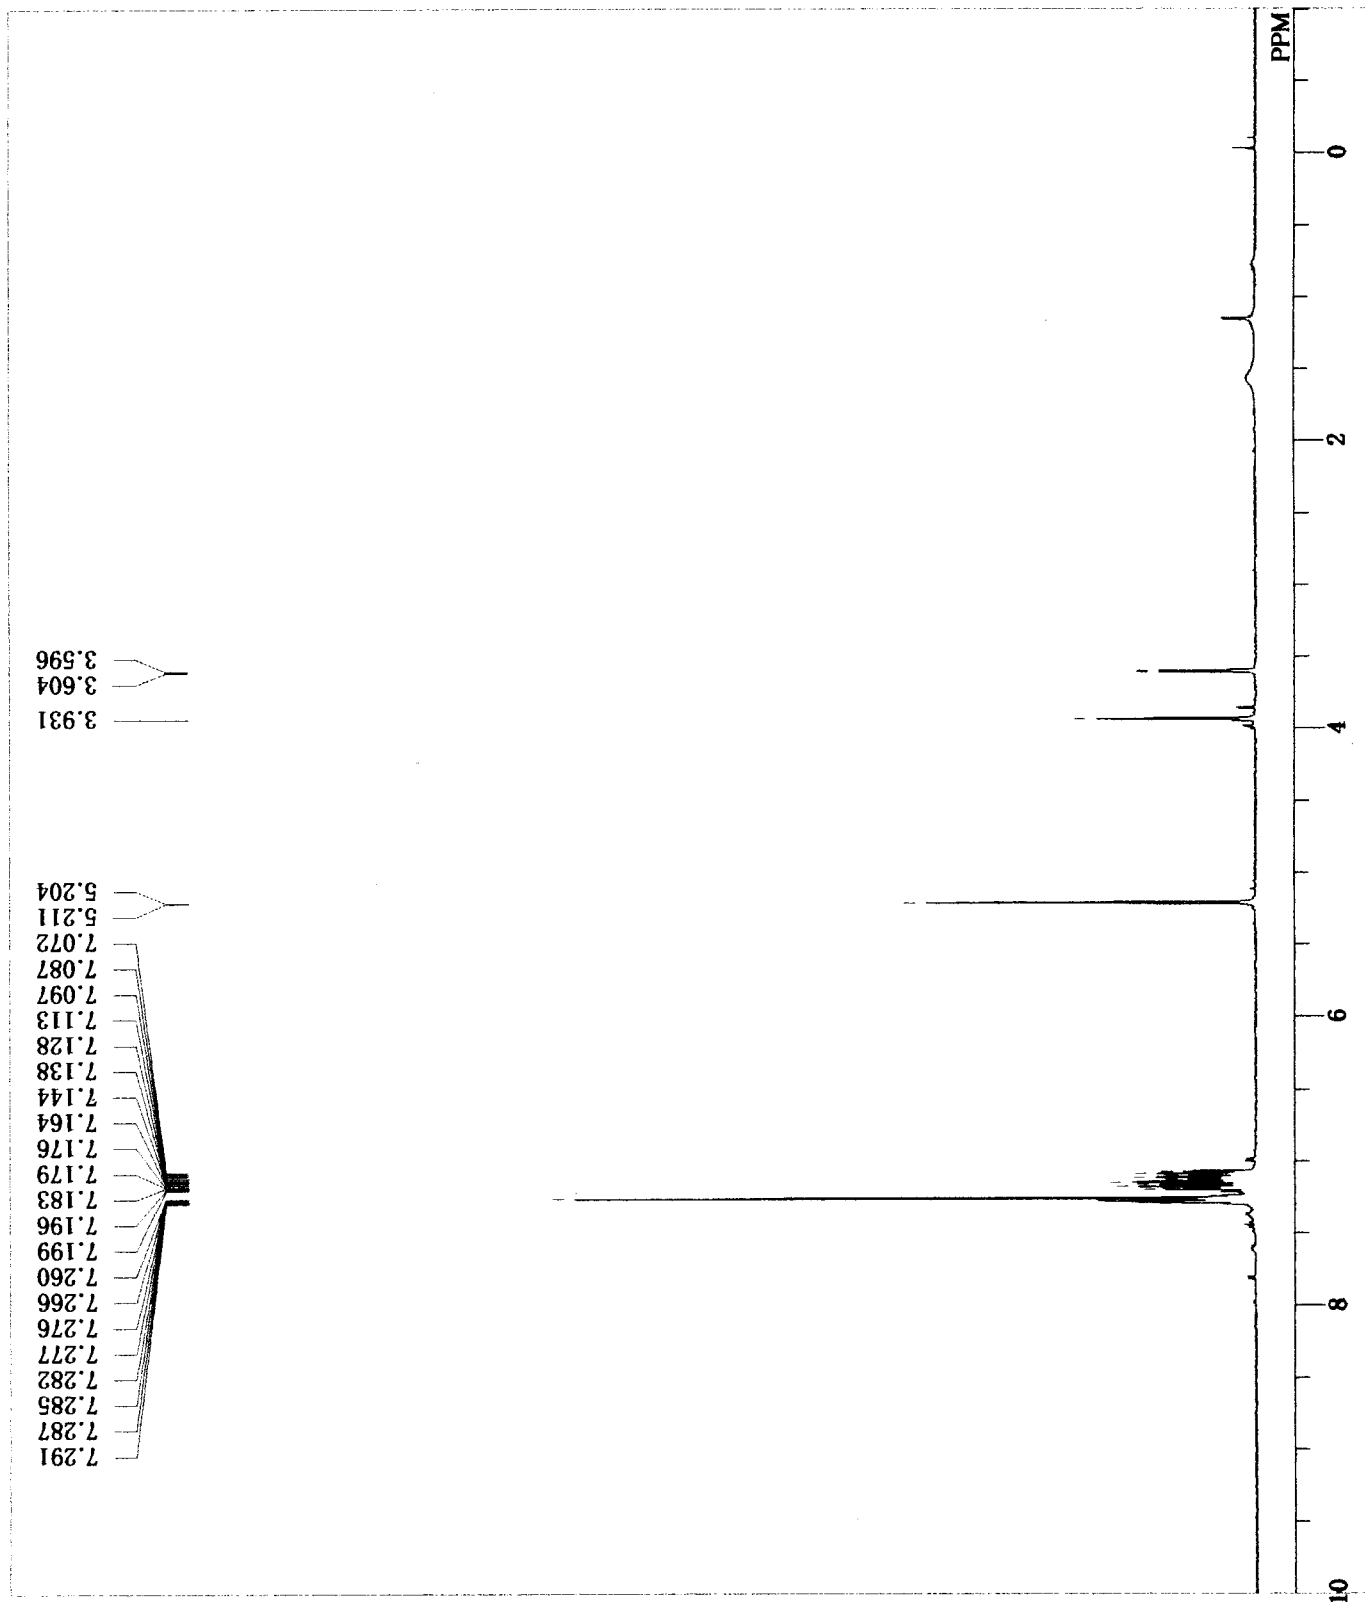

Benzyl 4,4,4-trifluorobutynoate (6a)

DRILE  
COMNT  
DATIM  
OBNUC  
EXMOD  
OBFRQ  
OBSET  
OBFIN  
POINT  
FREQU  
SCANS  
ACQTM  
PD  
PW1  
IRNUC  
CTEMP  
SLVNT  
EXREF  
BF  
RGAIN

FID  
Benzyl 4,4,4-trifluorobuty  
Mon Jan 30 17:15:00 2006  
1H  
zg30  
500.13 MHz  
3.08 KHz  
8.51 Hz  
32768  
10330.58 Hz  
16  
0.0000 sec  
0.0000 sec  
10.00 usec  
294.1 c  
CDCl3  
7.26 ppm  
0.10 Hz  
128

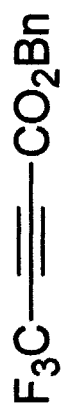

6a

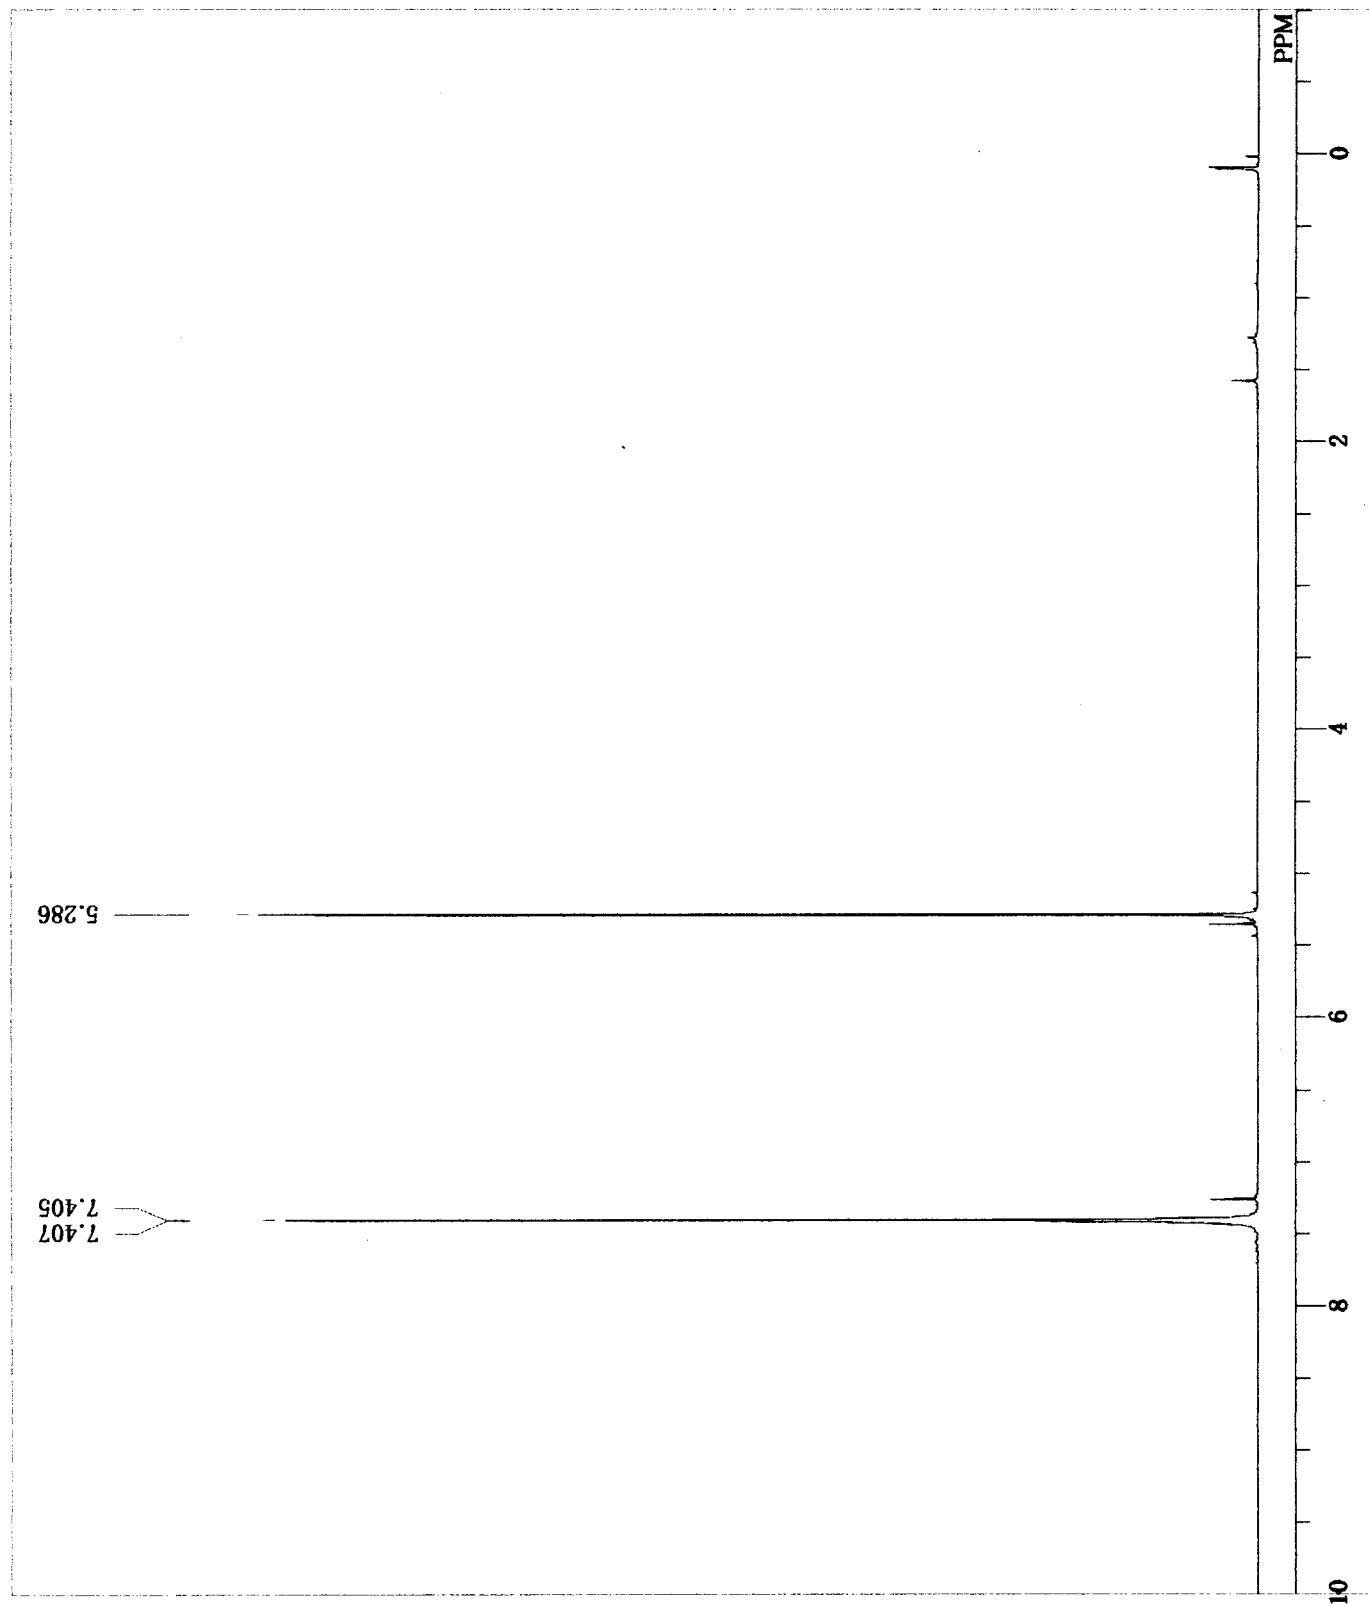

# Benzyl 4,4,4-trifluorobutynoate (6a)

DFILE  
 COMNT  
 DATIM  
 OBNUC  
 EXMOD  
 OBFRQ  
 OBSET  
 OBFIN  
 POINT  
 FREQU  
 SCANS  
 ACQTM  
 PD  
 PW1  
 IRNUC  
 CTEMP  
 SLVNT  
 EXREF  
 BF  
 RGAIN

FID  
 Benzyl 4,4,4-trifluorobuty  
 Mon Jan 30 17:22:47 2006  
 13C  
 zgpg30  
 125.77 MHz  
 0.36 KHz  
 4.30 Hz  
 32768  
 30030.03 Hz  
 256  
 0.0000 sec  
 0.0000 sec  
 10.00 usec  
 295.1 c  
 CDCl3  
 77.00 ppm  
 1.00 Hz  
 3649

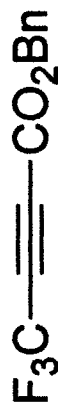

6a

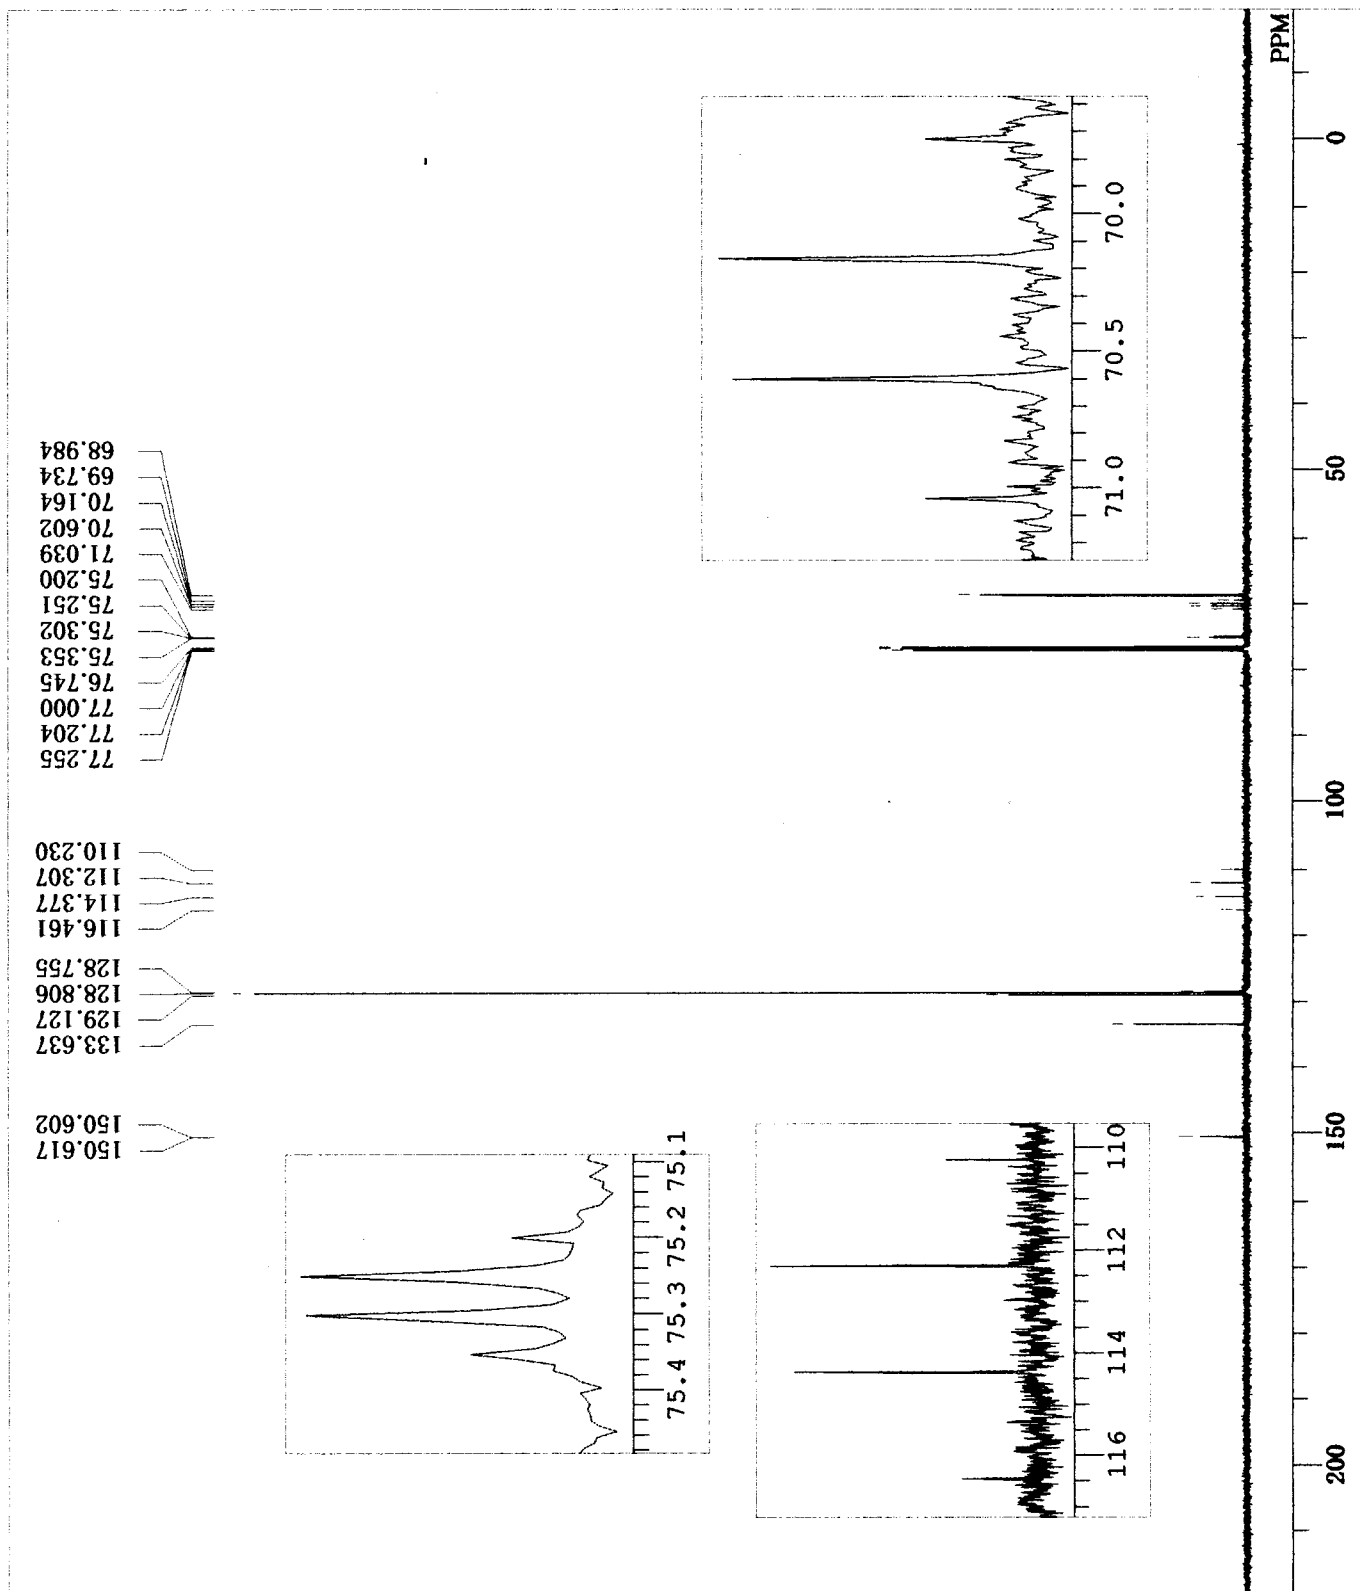

iodide coupling

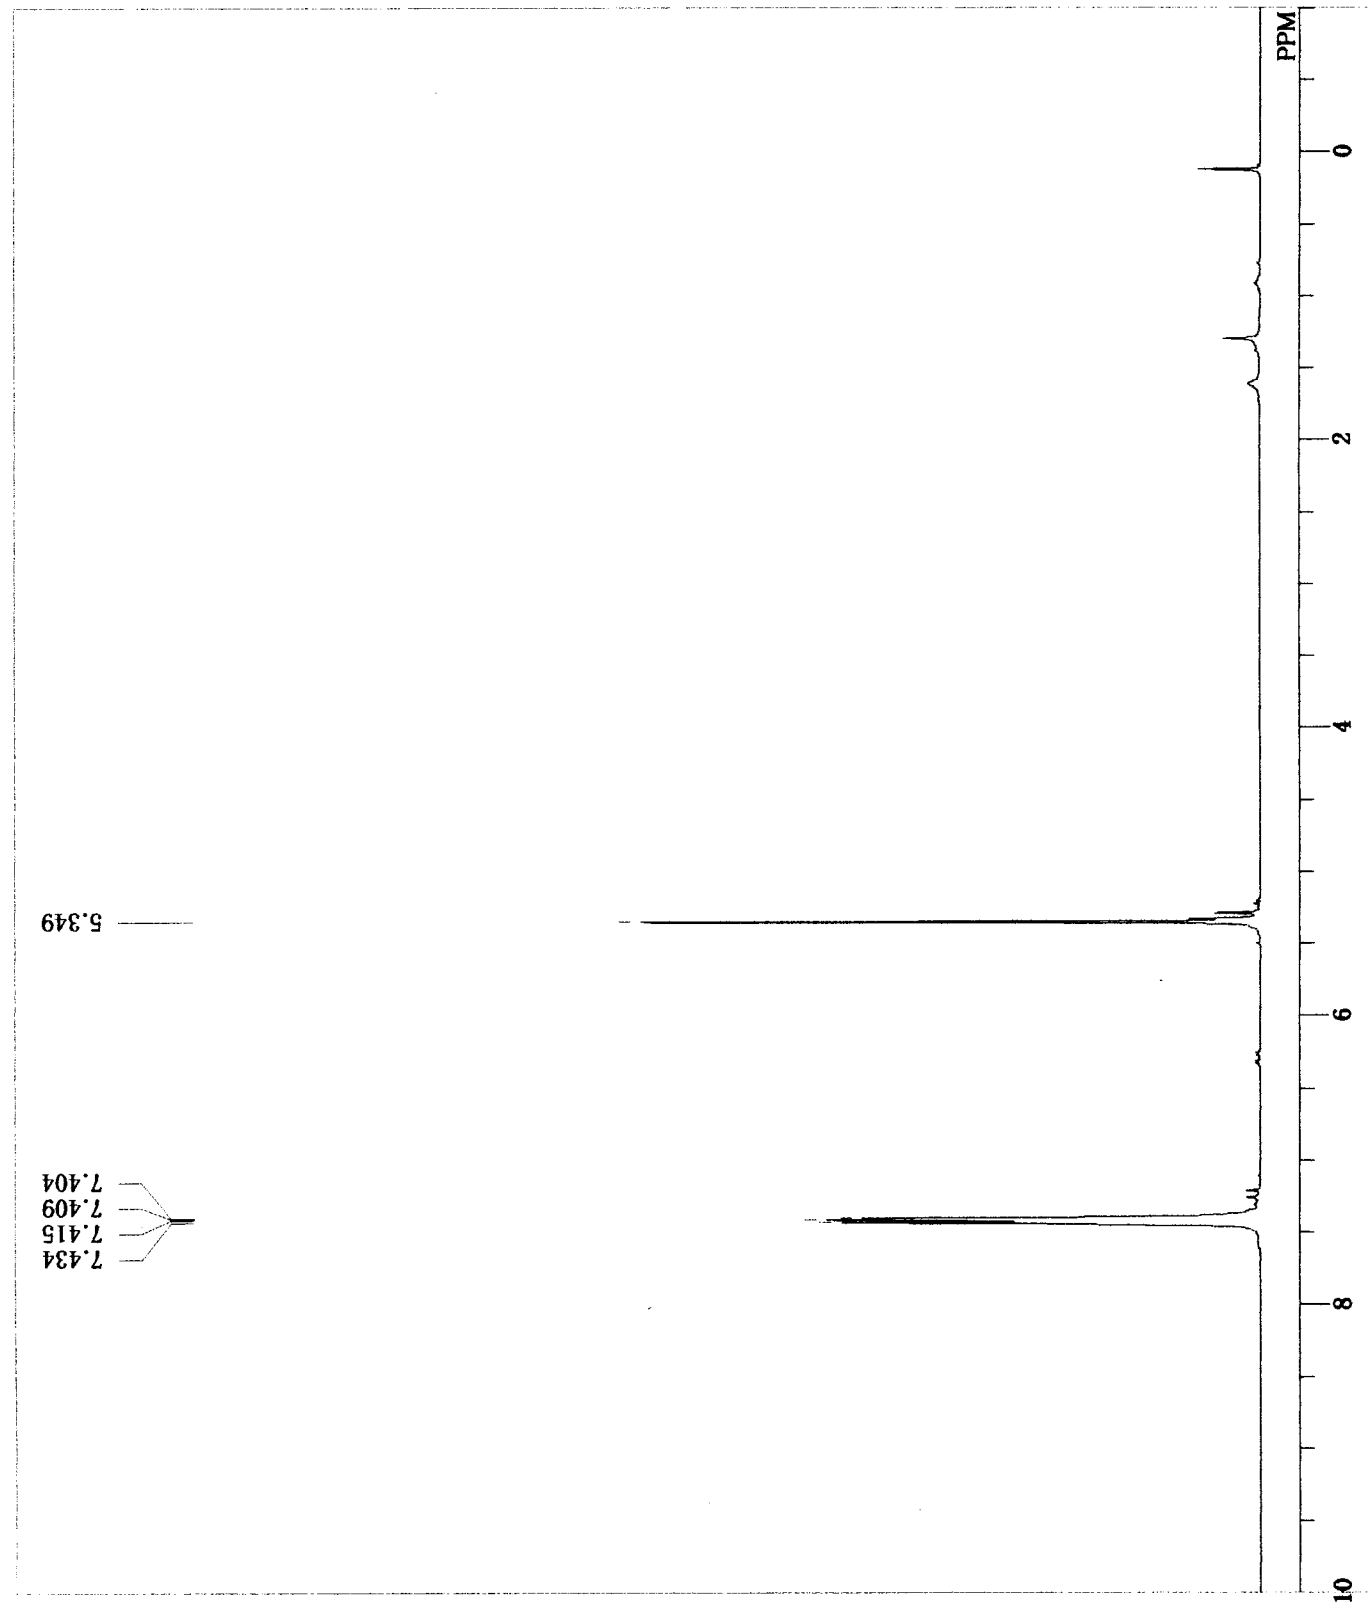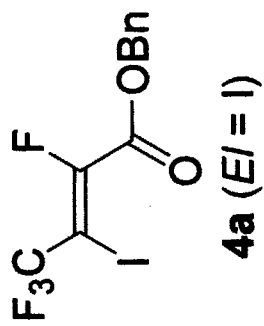

DRILE FID  
COMNT iodide coupling  
DATIM Wed Jul 12 12:02:01 2006  
OBNUC 1H  
EXMOD zg30  
OBFRQ 500.13 MHz  
OBSET 3.08 KHz  
OBFIN 8.51 Hz  
POINT 32768  
FREQU 10330.58 Hz  
SCANS 16  
ACQTM 0.0000 sec  
PD 0.0000 sec  
PW1 10.00 usec  
IRNUC 299.7 c  
CTEMP CDC13  
SLVNT 7.26 ppm  
EXREF 0.10 Hz  
BF 128  
RGAIN

# iodide-coupling

DRILE  
COMNT  
DATIM  
OBNUC  
EXMOD  
OBFRO  
OBSET  
OBFIN  
POINT  
FREQU  
SCANS  
ACQTM  
PD  
PW1  
IRNUC  
CTEMP  
SLVNT  
EXREF  
BF  
RGAIN

iodine-coupling(C).als  
iodide-coupling  
Wed Jul 12 12:21:05 2006  
13C  
zgpg30

125.77 MHz  
0.36 KHz  
4.30 Hz  
32768  
30030.03 Hz  
256  
0.0000 sec  
0.0000 sec  
10.00 usec  
300.0 c  
CDCl3  
77.00 ppm  
1.00 Hz  
2298

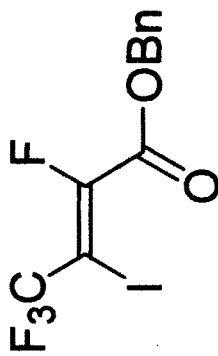

4a (EI = I)

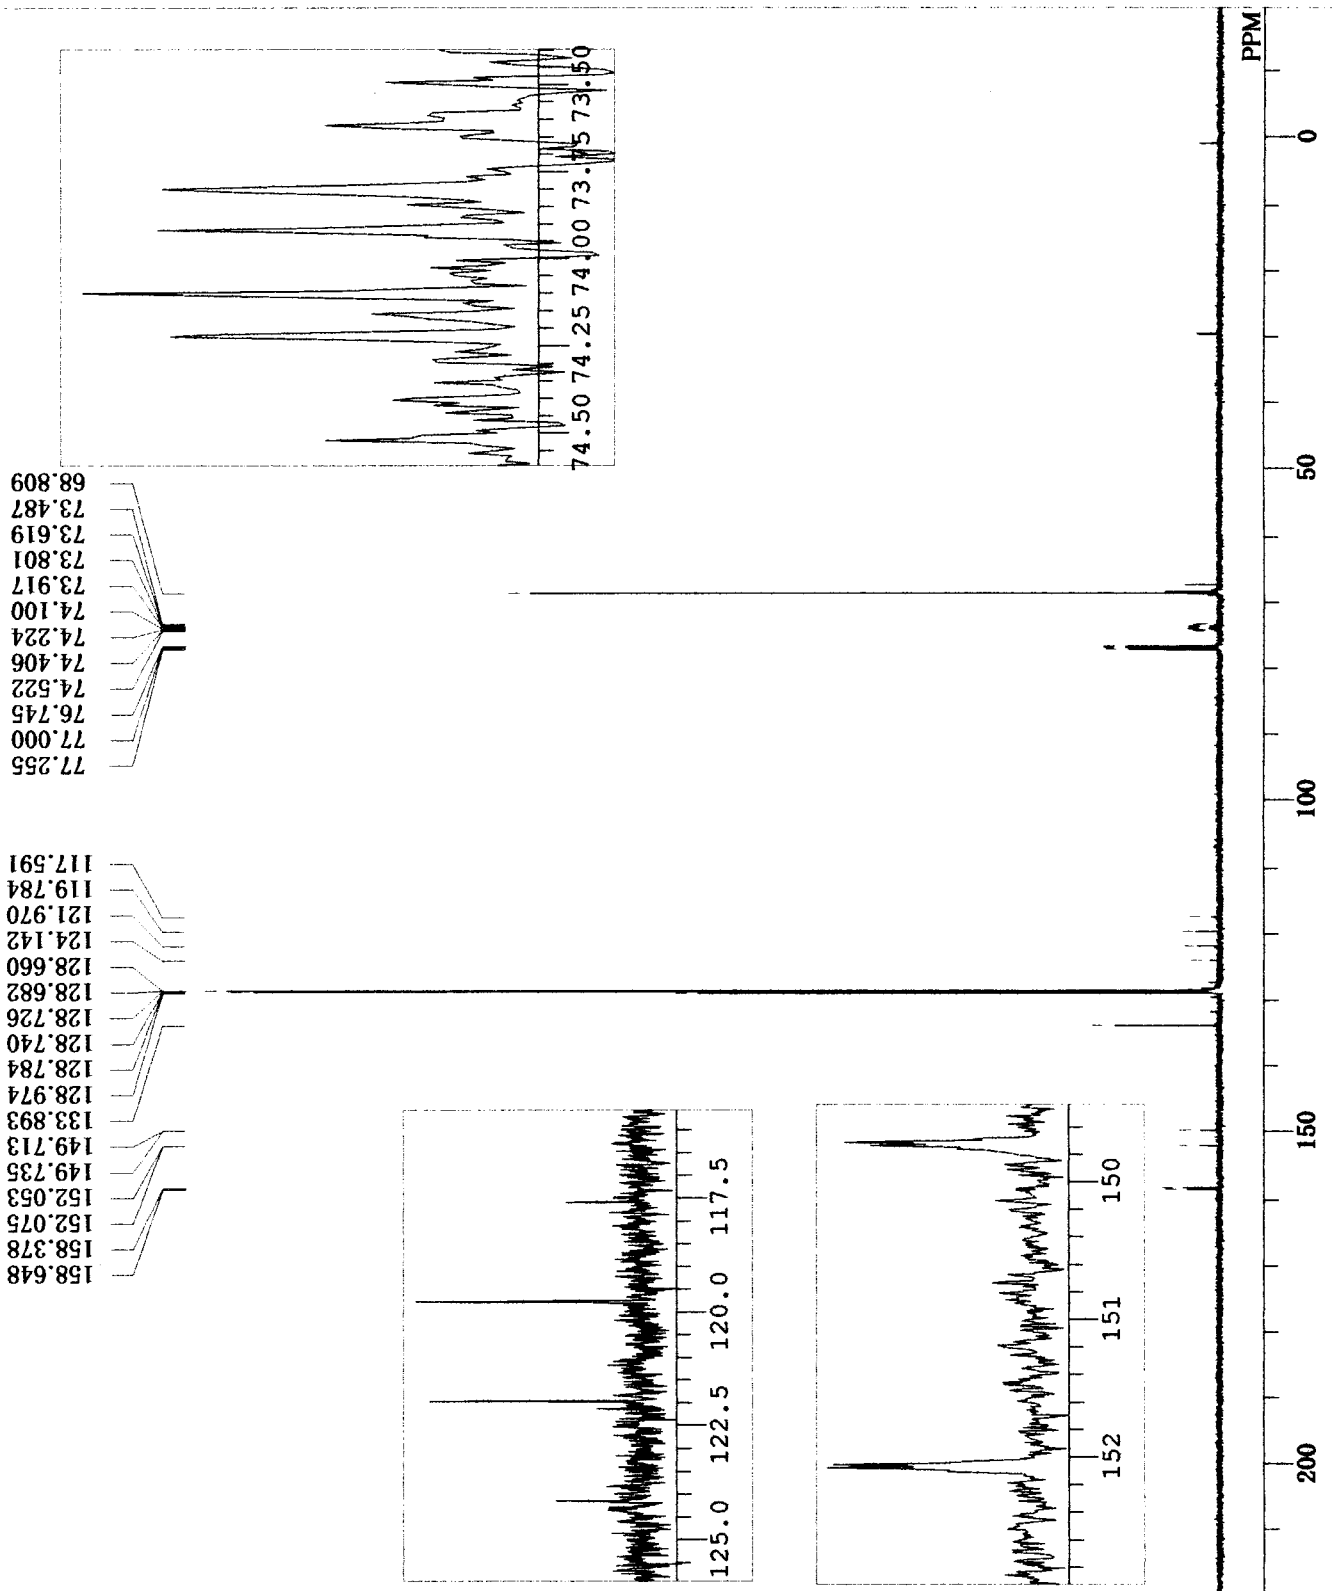

DRILE FID  
COMNT allyl-coupling  
DATIM Mon May 22 10:54:22 2004  
OBNUC 1H  
EXMOD zg30  
OBFRQ 500.13 MHz  
OBSET 3.08 KHz  
OBFIN 8.51 Hz  
POINT 32768  
FREQU 10330.58 Hz  
SCANS 16  
ACQTM 0.0000 sec  
PD 0.0000 sec  
PW1 10.00 usec  
IRNUC 300.2 c  
CTEMP CDC13  
SLVNT 7.26 ppm  
EXREF 0.10 Hz  
BF 362  
RGAIN

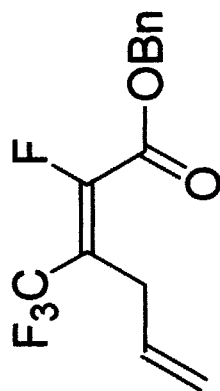**4a (E/E = allyl)**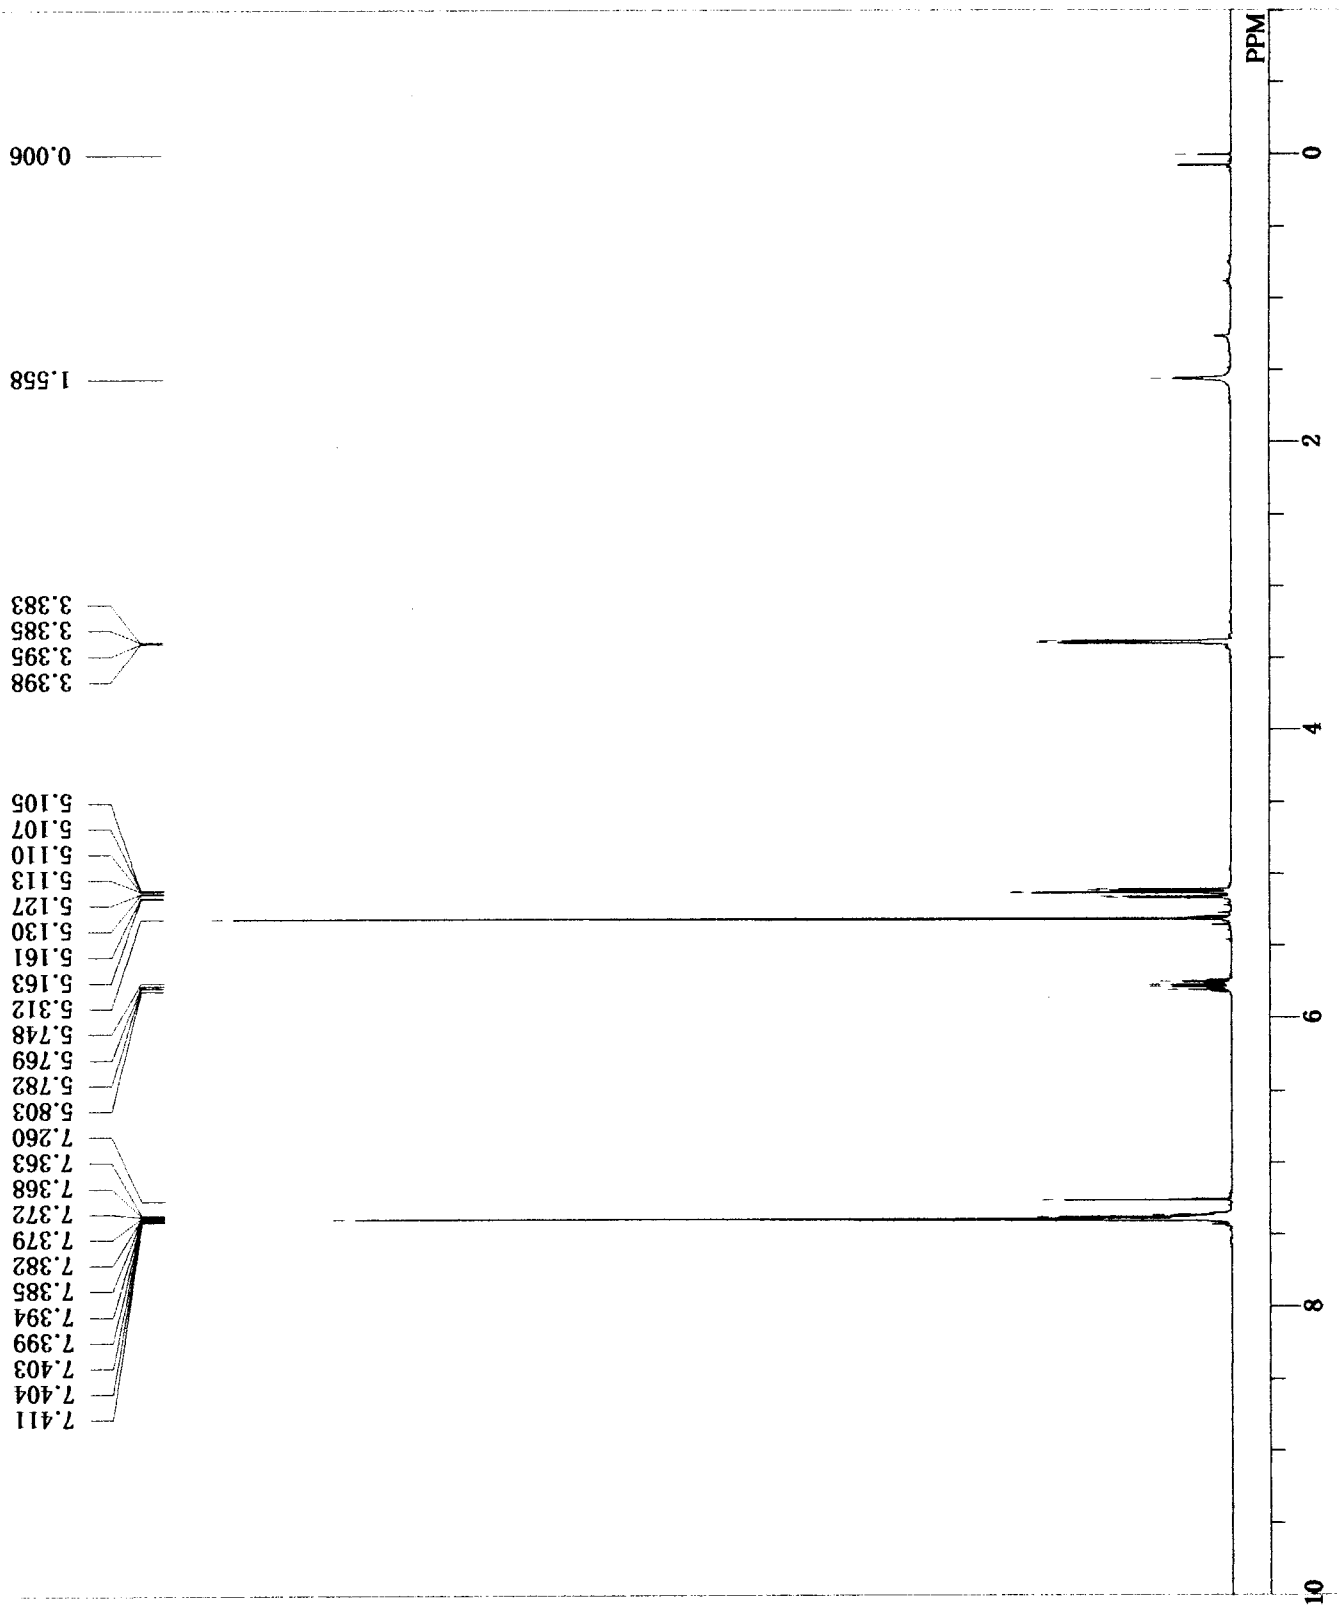

# allyl coupling

DRILE COMNT allyl-coupling(C).als  
 DATIM allyl coupling  
 OBNUC Wed Jun 06 14:20:43 2007  
 EXMOD 13C  
 BCM 100.40 MHz  
 OBFRQ 125.00 KHz  
 OBSET 10500.00 Hz  
 OBFIN 32768  
 POINT 27118.64 Hz  
 FREQU 256  
 SCANS 1.2083 sec  
 ACQTM 1.7920 sec  
 PD 5.70 usec  
 PW1 1H  
 IRNUC 24.4 c  
 CTMP CDCL3  
 SLVNT 77.00 ppm  
 EXREF 1.00 Hz  
 BF 24  
 RGAIN

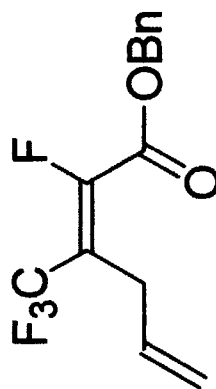

4a (EI = allyl)

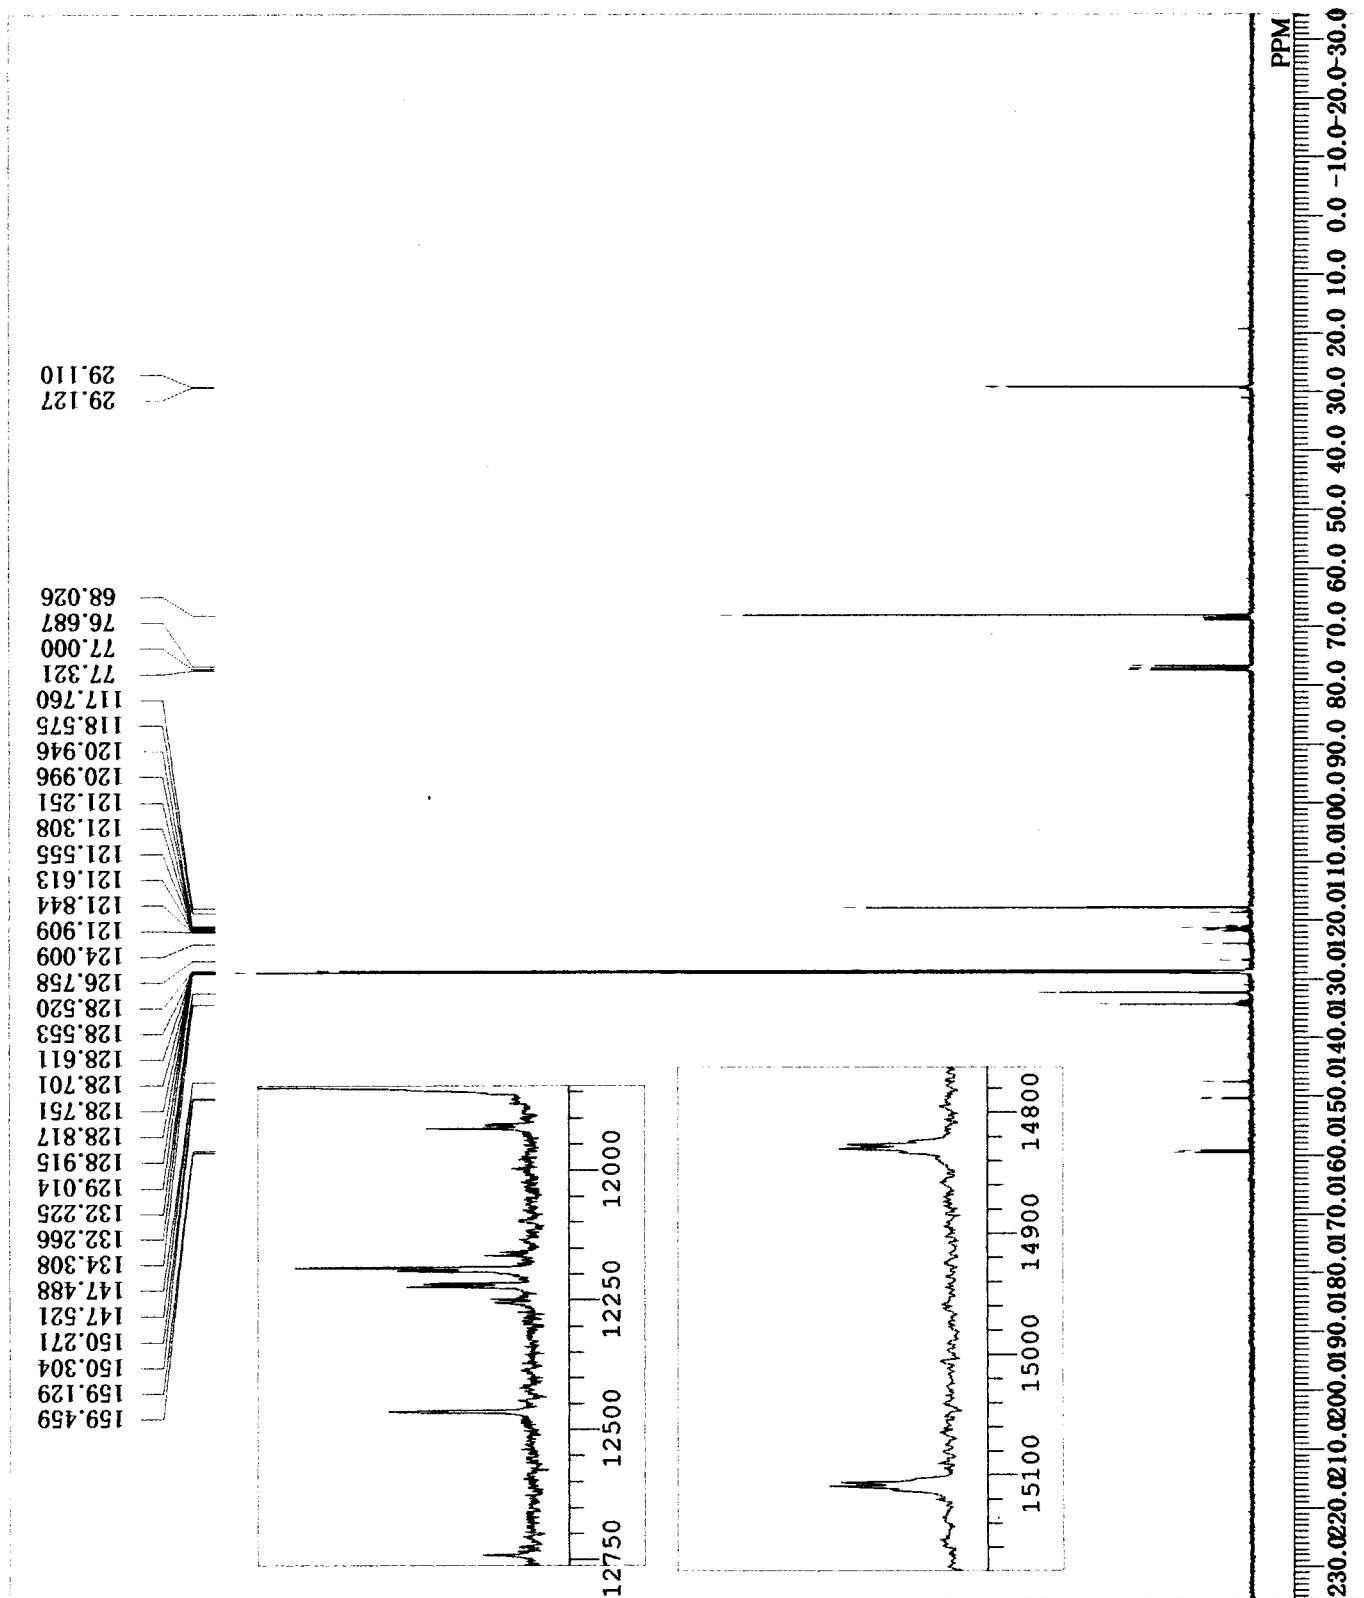

DRILE FID  
COMNT methallyl coupling  
DATIM Tue May 23 09:19:22 2006  
OBNUC 1H  
EXMOD zg30  
OBFRQ 500.13 MHz  
OBSET 3.08 KHz  
OBFIN 8.51 Hz  
POINT 32768  
FREQU 10330.58 Hz  
SCANS 16  
ACQTM 0.0000 sec  
PD 0.0000 sec  
PW1 10.00 usec  
IRNUC 298.4 c  
CTEMP CDCl3  
SLVNT 7.26 ppm  
EXREF 0.10 Hz  
BF 128  
RGAIN

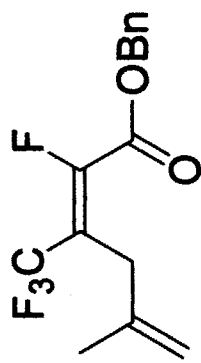**4a (E/methallyl)**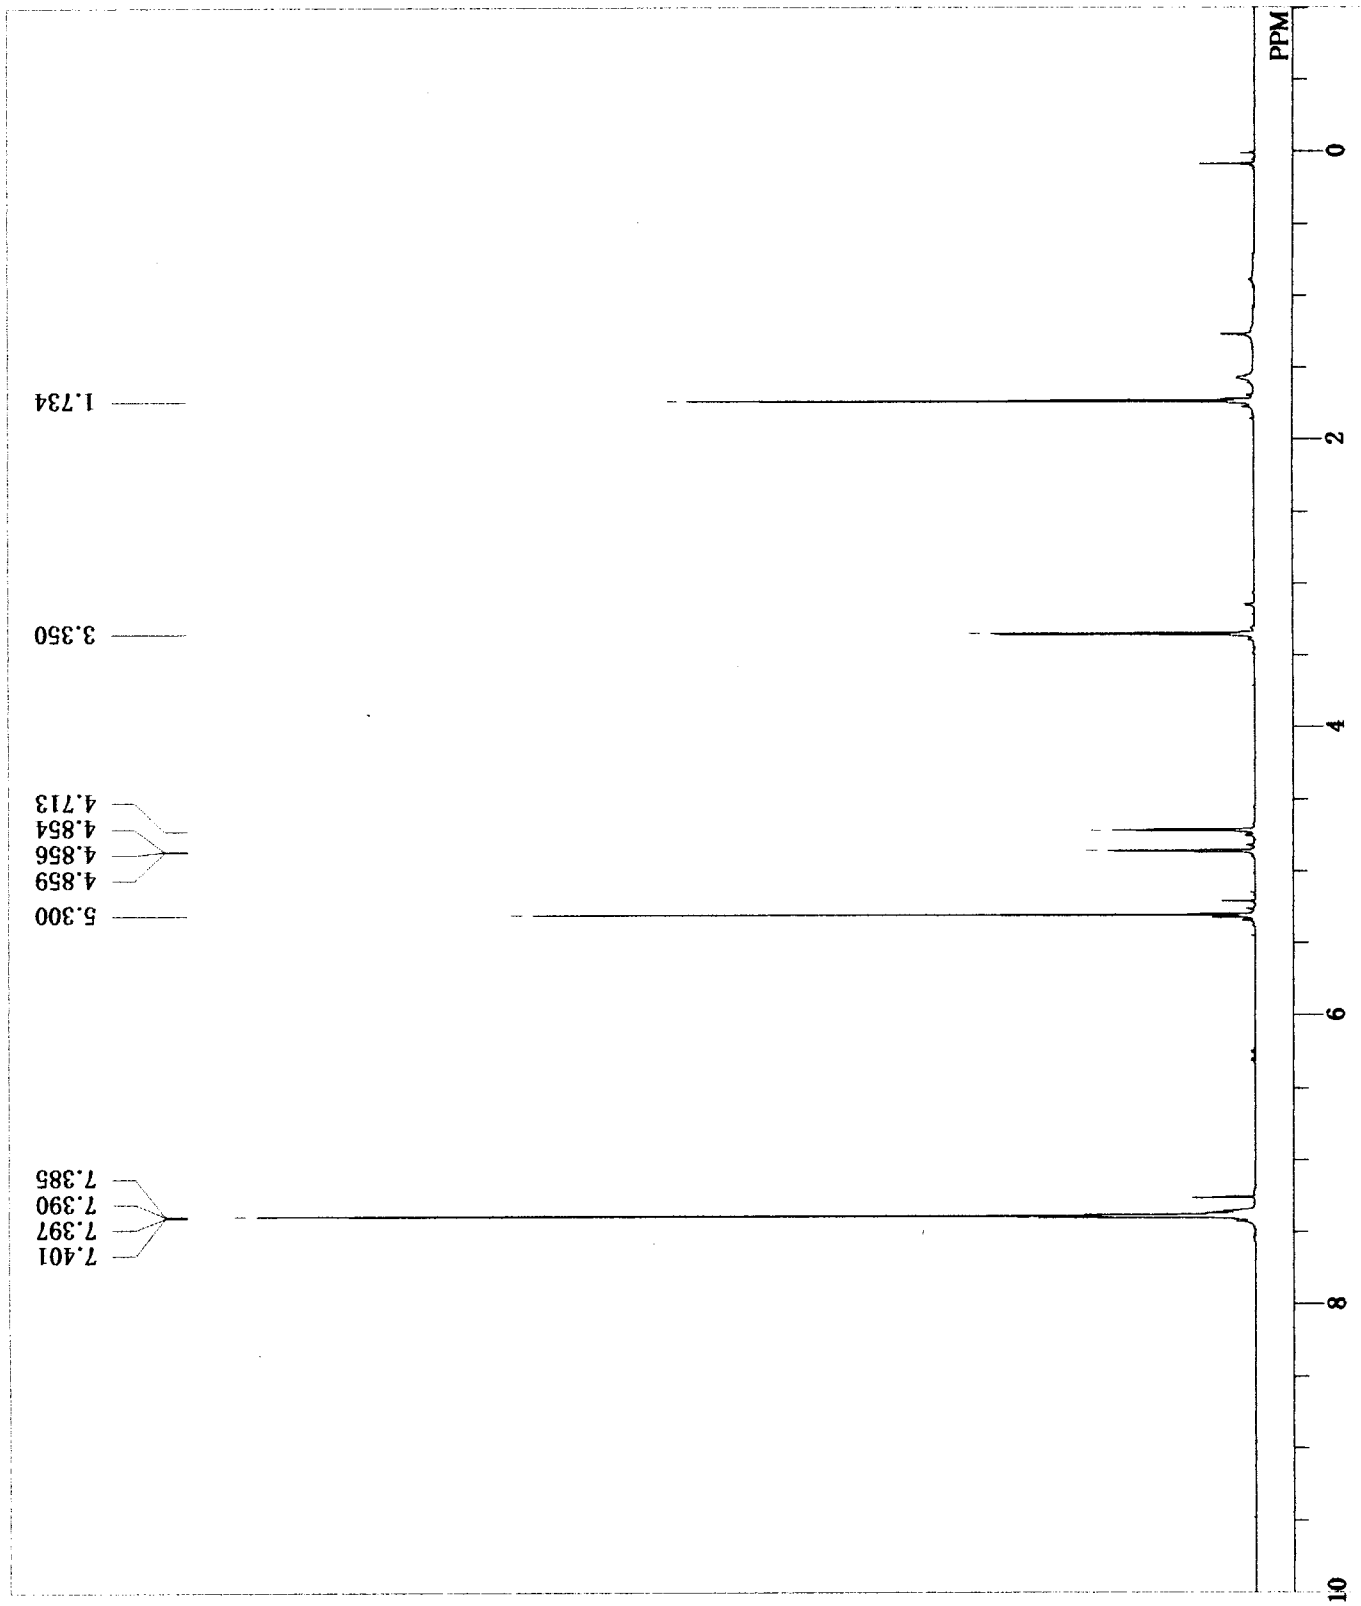

# methallyl coupling

DFILE  
COMNT  
DATIM  
OBNUC  
EXMOD  
OBFRQ  
OBSET  
OBFIN  
POINT  
FREQU  
SCANS  
ACQTM  
PD  
PW1  
IRNUC  
CTEMP  
SLVNT  
EXREF  
BF  
RGAIN

methallyl-coupling(C).als  
methallyl coupling  
Tue Jun 05 08:16:10 2007  
13C  
BCM  
100.40 MHz  
125.00 KHz  
10500.00 Hz  
32768  
27118.64 Hz  
13600  
1.2083 sec  
1.7920 sec  
5.70 usec  
1H  
22.9 c  
CDCL3  
77.00 ppm  
1.00 Hz  
24

22.425  
32.601  
32.618

159.450  
159.113  
150.897  
150.864  
150.831  
148.122  
148.089  
148.056  
140.425  
140.392  
134.258  
128.817  
128.775  
128.693  
128.496  
126.693  
123.951  
123.926  
121.835  
121.769  
121.547  
121.490  
121.251  
121.177  
120.938  
120.872  
118.460  
118.435  
112.005  
77.313  
77.000  
76.679  
68.043

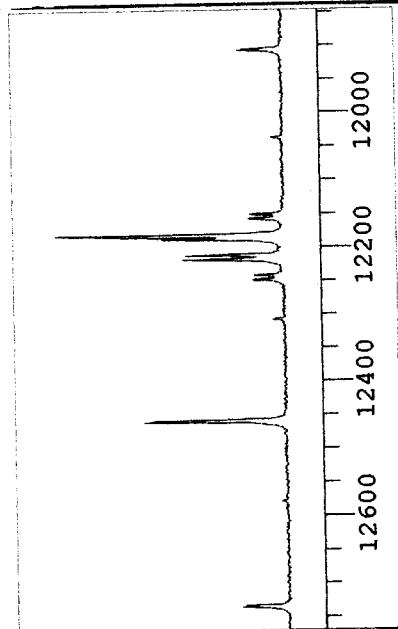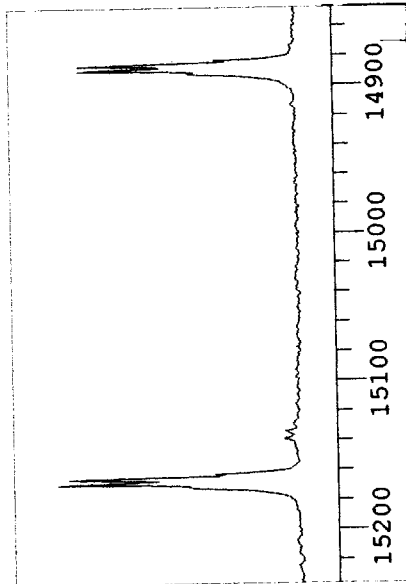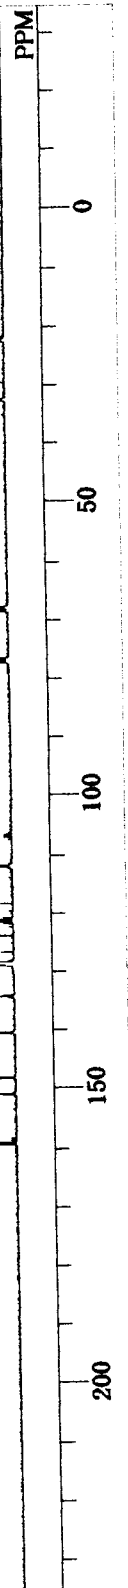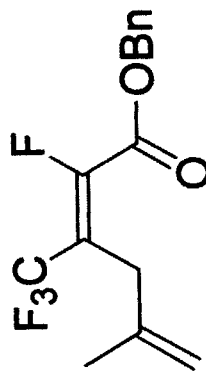

**4a** (EI = methallyl)

DRILE COMNT crotyl coupling  
DATIM Tue May 23 09:36:09 2006  
OBNUC 1H  
EXMOD zg30  
OBFRQ 500.13 MHz  
OBSET 3.08 KHz  
OBFIN 8.51 Hz  
POINT 32768  
FREQU 10330.58 Hz  
SCANS 16  
ACQTM 0.0000 sec  
PD 0.0000 sec  
PW1 10.00 usec  
IRNUC 298.5 c  
CTEMP CDC13  
SLVNT 7.26 ppm  
EXREF 0.10 Hz  
BF 228  
RGAIN

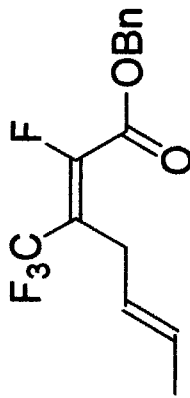**4a (E/crotyl)**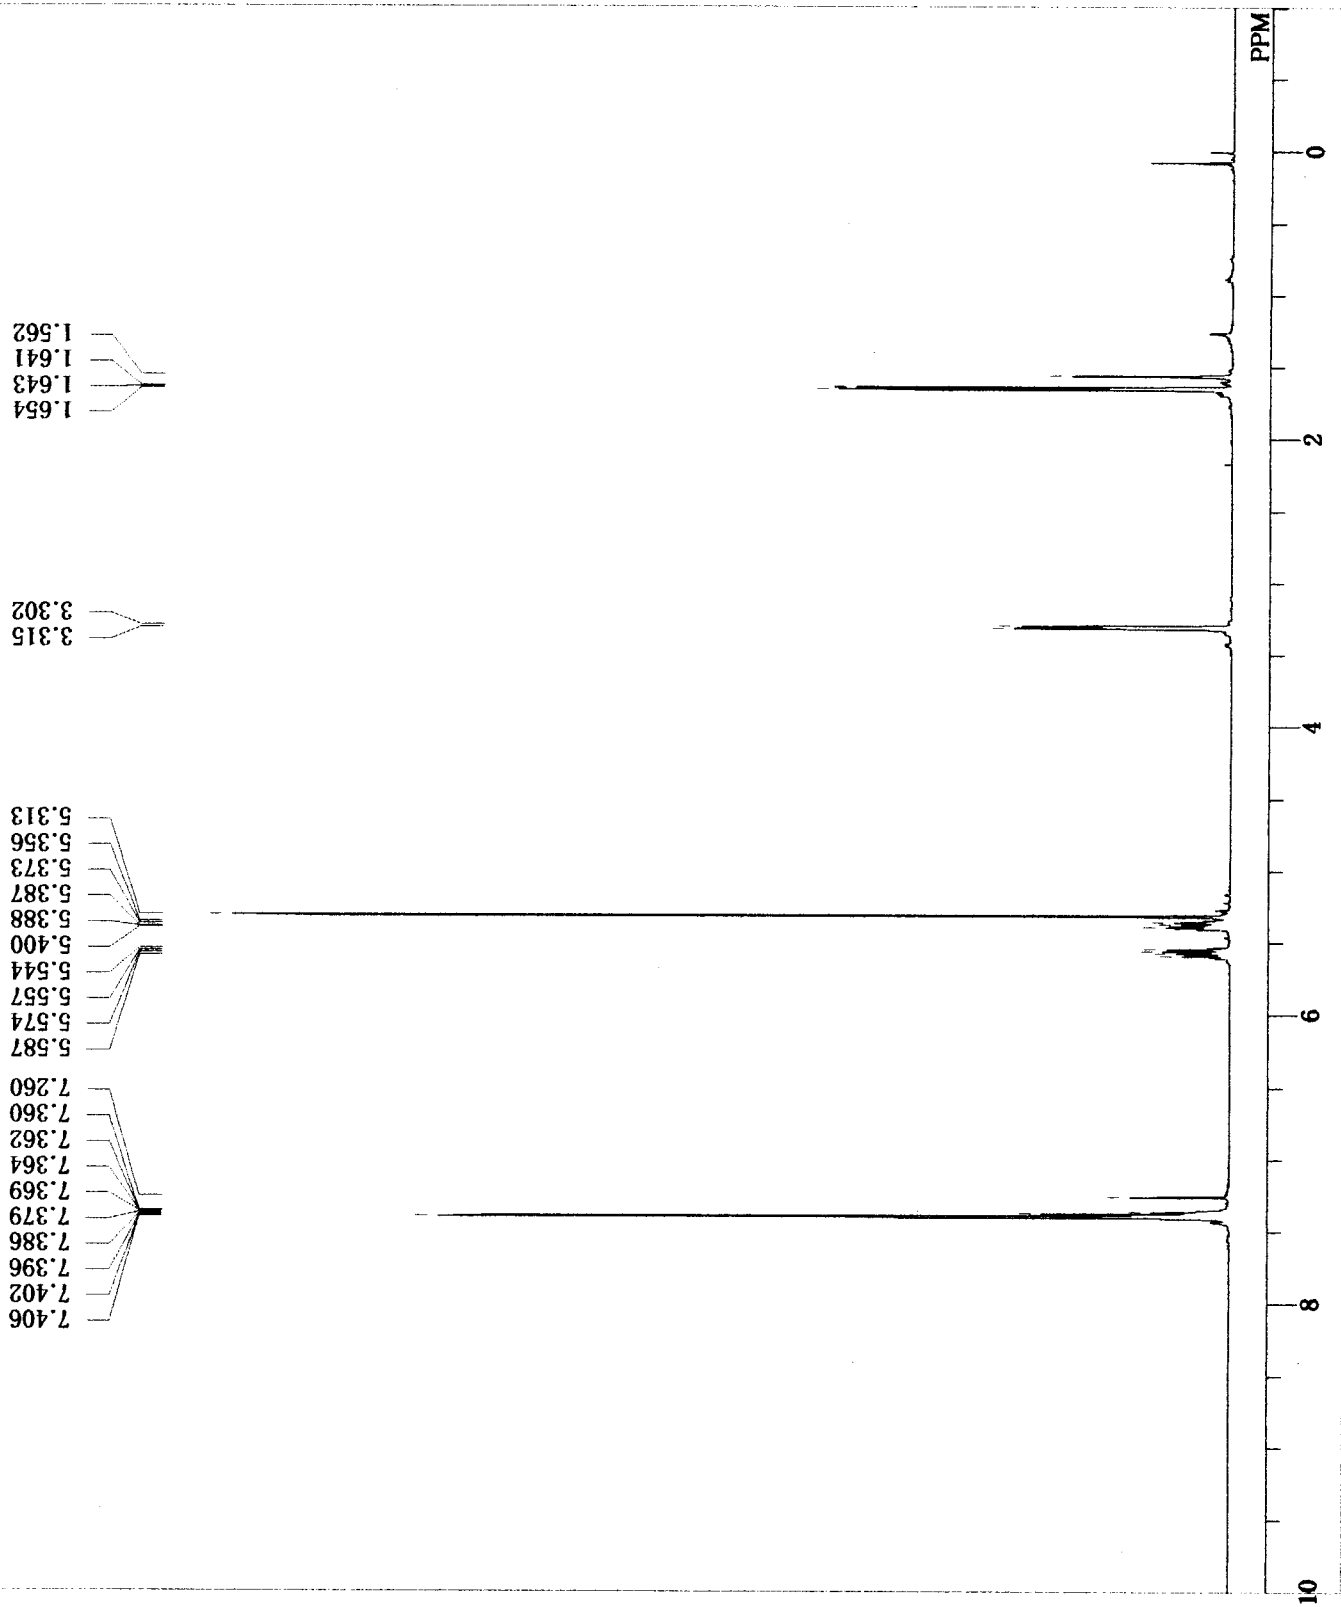

# Crotyl coupling

crotyl-coupling(C).als  
 Crotyl coupling  
 Wed Jun 06 08:12:58 2007  
 13C  
 BCM

100.40 MHz  
 125.00 KHz  
 10500.00 Hz  
 32768  
 27118.64 Hz  
 13600  
 1.2083 sec  
 1.7920 sec  
 5.70 usec  
 1H  
 23.4 c  
 CDCL3  
 77.00 ppm  
 1.00 Hz  
 24

DRILE  
 COMNT  
 DATIM  
 OBNUC  
 EXMOD  
 OBFRO  
 OBSET  
 OBFIN  
 POINT  
 FREQU  
 SCANS  
 ACQTM  
 PD  
 PW1  
 IRNUC  
 CTEMP  
 SLVNT  
 EXREF  
 BF  
 RGAIN

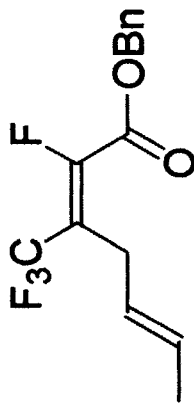

4a (E/ = crotyl)

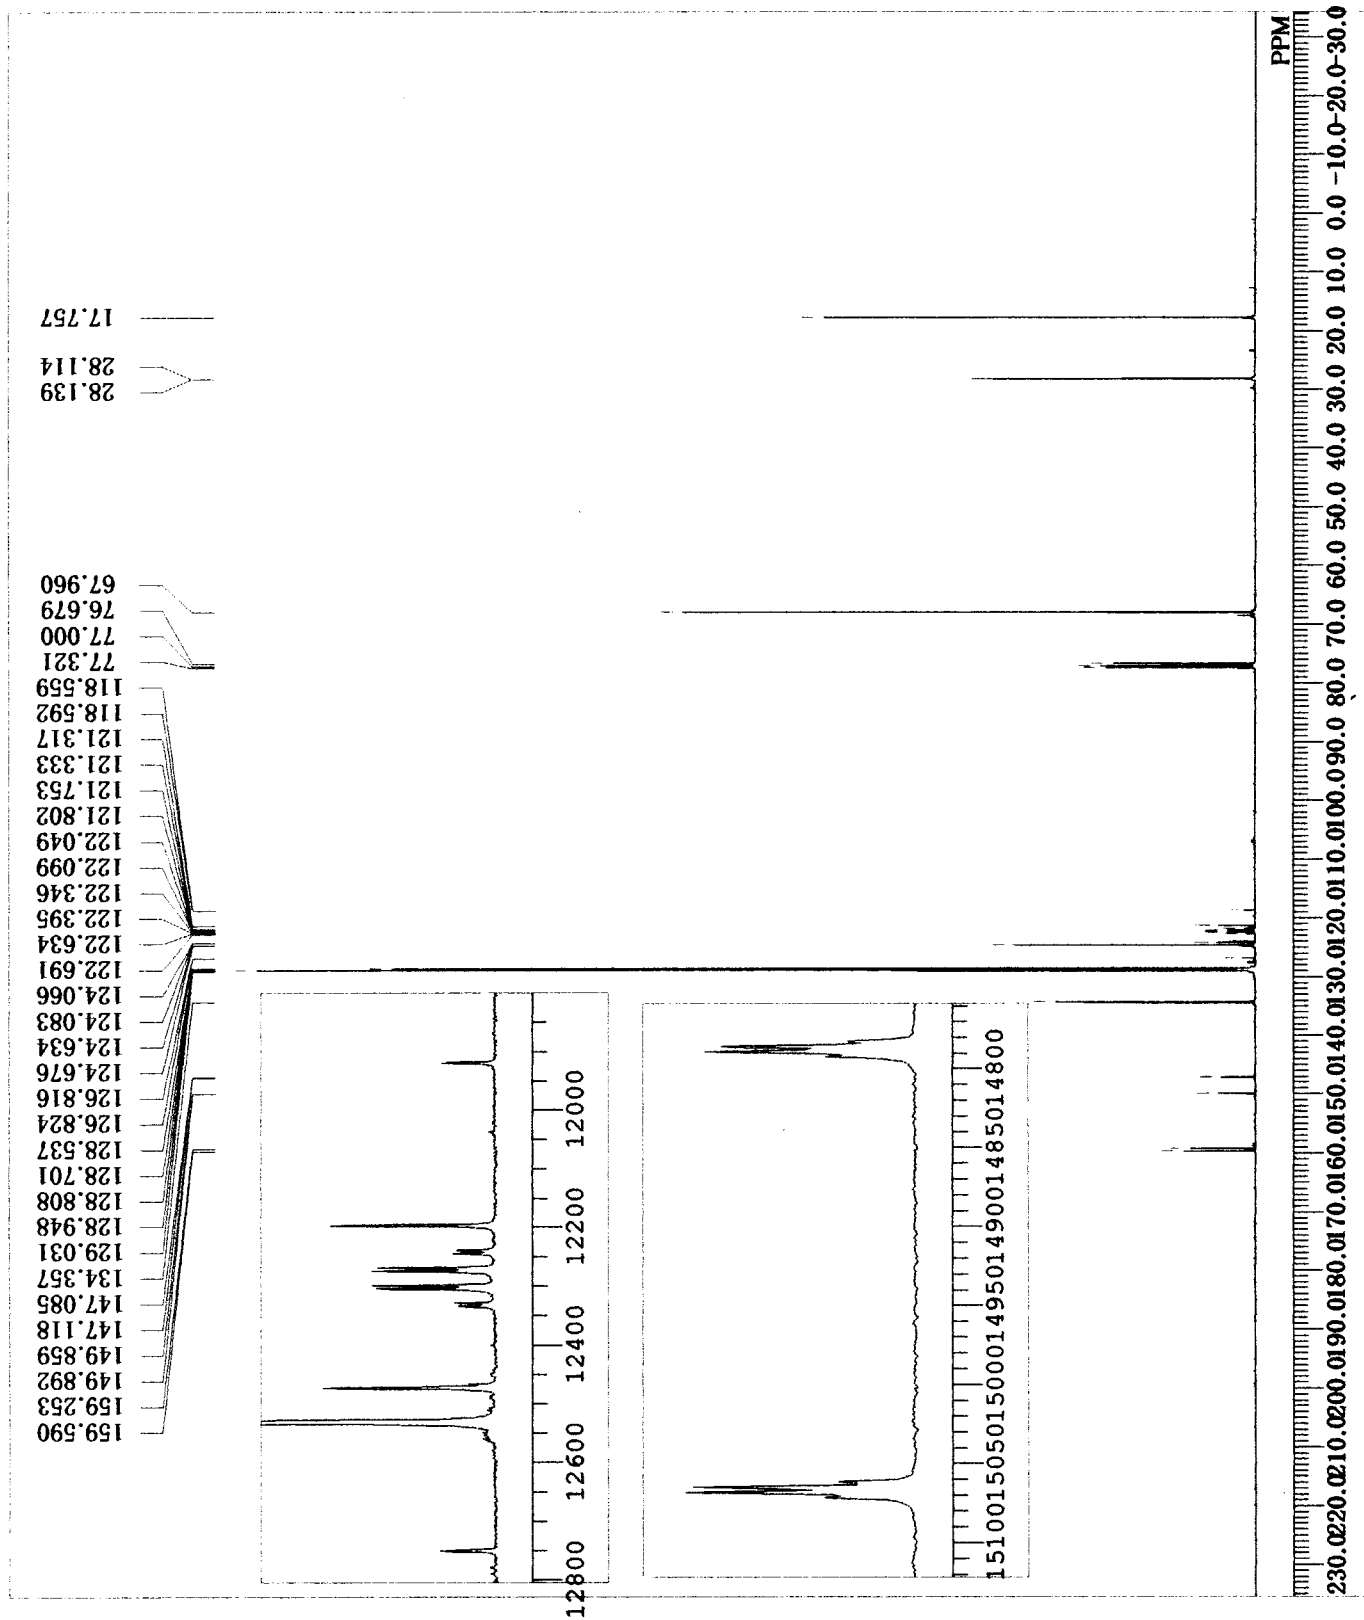

# Benzyl 4,4,4-trifluoro-3-phenylcrotonate (5a)

DFILE COMNT  
 DATIM  
 OBNUC  
 EXMOD  
 OBFREQ  
 OBSET  
 OBFIN  
 POINT  
 FREQU  
 SCANS  
 ACQTM  
 PD  
 PW1  
 IRNUC  
 CTEMP  
 SLVNT  
 EXREF  
 BF  
 RGAIN

fid  
 Benzyl 4,4,4-trifluoro-3-p  
 Tue Jan 23 12:44:34 2007  
 1H  
 zg30  
 500.13 MHz  
 3.08 KHz  
 8.51 Hz  
 32768  
 10330.58 Hz  
 16  
 0.0000 sec  
 0.0000 sec  
 10.00 usec  
 293.8 c  
 CDCl3  
 7.26 ppm  
 0.10 Hz  
 645

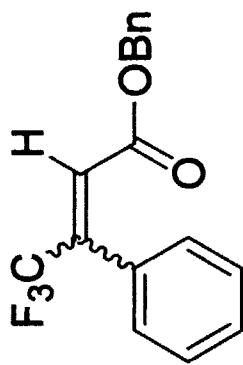

5a

7.432  
 7.428  
 7.416  
 7.411  
 7.404  
 7.400  
 7.398  
 7.394  
 7.387  
 7.382  
 7.376  
 7.370  
 7.365  
 7.363  
 7.353  
 7.350  
 7.305  
 7.300  
 7.295  
 7.290  
 7.274  
 7.260  
 7.109  
 7.105  
 7.097  
 7.090  
 6.648  
 6.645  
 6.369  
 5.272  
 5.025

0.002

PPM
